# Supplementary material for: Genome-Wide Analysis of Effectors of Peroxisome Biogenesis
Source: PLoS One. 2010 Aug 4;5(8):e11953. doi: 10.1371/journal.pone.0011953 (PMC2915925; doi:10.1371/journal.pone.0011953)
Supplement: Table S1 — Flow Cytometry and Image Analysis. S1-1. Genome Wide Flow Cytometry and Imaging Analysis of Peroxisome Biogenesis Effectors. S1-2. Candidate Testing - Flow Cytometry. S1-3. Deletion Strains Not Studied. (0.63 MB XLS) [file pone.0011953.s004.xls]

## Sheet: 1
Genome Wide Flow Cytometry and Imaging Analysis of Peroxisome Biogenesis Effectors.
Position	Accession	Gene	I.	II.		I.	Flow Cytometry Analysis
101F10	YLL002W	REM50	-1.92561	H			Standard scores of the regression modeled values of Pot1p-GFP fluorescence.
101F11	YLL005C	SPO75	0.263767	G
101F12	YLL010C	PSR1	0.807619	A		II.	Confocal Microscopy Analysis
101F9	YLL001W	DNM1	1.06177	H			Phenotype	Key
101G1	YLL012W	YLL012W	1.52427	H			Normal	A
101G10	YLL023C	YLL023C	0.0193539	A			Fewer	B
101G11	YLL024C	SSA2	0.198351	A			More	C
101G12	YLL025W	YLL025W	-0.364658	A			Smaller	D
101G2	YLL013C	YLL013C	0.514893	H			Larger	E
101G3	YLL014W	YLL014W	-0.144815	G			Lighter	G
101G4	YLL015W	BPT1	-1.88861	A			Dim	H
101G5	YLL016W	SDC25	0.903258	G			No Signal	I
101G6	YLL017W	YLL017W	0.615512	G			Inheritance	J
101G7	YLL019C	KNS1	-3.65848	G			Mislocalized	K
101G8	YLL020C	YLL020C	0.367646	G			Partial Mislocalized	L
101G9	YLL021W	SPA2	0.314828	G			Not Annotated	NA
101H1	YLL026W	HSP104	0.463196	G
101H10	YLL043W	FPS1	0.671904	A
101H11	YLL045C	RPL8B	0.56531	G
101H2	YLL028W	TPO1	0.420516	A
101H4	YLL029W	YLL029W	0.139987	D
101H5	YLL032C	YLL032C	-0.517005	A
101H6	YLL038C	ENT4	0.0770502	G
101H7	YLL039C	UBI4	-2.51318	G
101H8	YLL040C	VPS13	0.723273	A
101H9	YLL041C	SDH2	-0.24286	G
102A1	YLL047W	YLL047W	-1.84421	G
102A10	YLL058W	YLL058W	0.422048	A
102A11	YLL060C	GTT2	0.325342	H
102A12	YLL061W	MMP1	0.972094	A
102A3	YLL051C	FRE6	-1.31437	A
102A4	YLL052C	AQY2	-1.82987	G
102A5	YLL053C	YLL053C	-0.301915	G
102A6	YLL054C	YLL054C	0.679987	A
102A7	YLL055W	YLL055W	0.828316	H
102A8	YLL056C	YLL056C	0.506376	H
102A9	YLL057C	YLL057C	-0.071302	H
102B1	YLL062C	MHT1	0.358061	A
102B10	YLR015W	BRE2	-0.235922	A
102B11	YLR016C	YLR016C	0.581529	A
102B12	YLR017W	MEU1	0.595988	H
102B2	YLL063C	AYT1	-0.924603	A
102B3	YLR001C	YLR001C	-1.07506	A
102B4	YLR003C	YLR003C	-1.45062	G
102B5	YLR004C	YLR004C	0.295909	A
102B6	YLR011W	LOT6	0.887171	G
102B7	YLR012C	YLR012C	0.729045	G
102B8	YLR013W	GAT3	0.391186	G
102B9	YLR014C	PPR1	0.805835	A
102C1	YLR018C	POM34	0.64656	G
102C10	YLR043C	TRX1	0.53994	A
102C11	YLR044C	PDC1	0.152121	H
102C12	YLR046C	YLR046C	0.227352	H
102C2	YLR019W	PSR2	-0.812307	A
102C3	YLR020C	YLR020C	-0.477322	A
102C4	YLR021W	YLR021W	-1.99023	A
102C5	YLR023C	YLR023C	0.446791	A
102C6	YLR024C	UBR2	0.567798	H
102C7	YLR025W	SNF7	-1.40352	H
102C8	YLR028C	ADE16	0.489671	A
102C9	YLR042C	YLR042C	0.750916	B
102D1	YLR047C	YLR047C	0.709305	A
102D10	YLR059C	REX2	0.693624	A
102D12	YLR062C	BUD28	0.66526	A
102D2	YLR048W	RPS0B	-2.08002	D
102D3	YLR049C	YLR049C	-0.582457	A
102D4	YLR053C	YLR053C	-0.206013	A
102D5	YLR054C	YLR054C	-2.20145	H
102D6	YLR055C	SPT8	-0.147062	H
102D8	YLR057W	YLR057W	-2.25898	K
102D9	YLR058C	SHM2	0.169243	H
102E1	YLR063W	YLR063W	-0.176133	A
102E10	YLR080W	YLR080W	0.311172	A
102E11	YLR081W	GAL2	0.523188	G
102E12	YLR082C	SRL2	0.554242	D
102E2	YLR064W	YLR064W	0.0259365	A
102E3	YLR065C	YLR065C	-1.16869	A
102E6	YLR073C	YLR073C	1.08141	A
102E8	YLR077W	YLR077W	-2.23867	B
102E9	YLR079W	SIC1	-2.04368	D
102F1	YLR083C	EMP70	0.341089	A
102F10	YLR095C	IOC2	-2.1384	A
102F11	YLR096W	KIN2	-2.56709	K
102F12	YLR097C	YLR097C	0.406657	A
102F2	YLR084C	RAX2	-1.64366	A
102F3	YLR085C	ARP6	-1.50457	D
102F5	YLR089C	YLR089C	0.0440484	A
102F6	YLR090W	XDJ1	0.929344	A
102F7	YLR092W	SUL2	-2.38135	K
102F8	YLR093C	NYV1	-2.28099	K
102F9	YLR094C	GIS3	0.460537	A
102G10	YLR113W	HOG1	0.851595	A
102G11	YLR114C	EFR4	1.28907	D
102G12	YLR118C	YLR118C	1.022	G
102G3	YLR102C	APC9	0.474735	A
102G4	YLR104W	YLR104W	-2.15891	D
102G5	YLR107W	REX3	0.631429	D
102G6	YLR108C	YLR108C	0.777811	G
102G7	YLR109W	AHP1	1.15614	A
102G8	YLR111W	YLR111W	-1.77006	G
102G9	YLR112W	YLR112W	-2.41328	K
102H1	YLR119W	SRN2	-2.44912	A
102H10	YML088W	UFO1	0.205266	G
102H11	YML087C	YML087C	NA	G
102H2	YLR120C	YPS1	-1.62883	A
102H4	YLR121C	YPS3	1.52427	A
102H5	YLR122C	YLR122C	0.434509	A
102H6	YLR123C	YLR123C	-2.22031	G
102H7	YLR124W	YLR124W	-2.18092	A
102H8	YLR125W	YLR125W	-2.12019	A
102H9	YML089C	YML089C	-1.97788	D
103A10	YML060W	OGG1	-0.223203	A
103A11	YML059C	YML059C	0.652226	A
103A12	YML058W	SML1	0.153551	A
103A8	YML063W	RPS1B	-1.29666	A
103A9	YML062C	MFT1	-1.51785	G
103B1	YML057W	CMP2	1.28309	A
103B10	YML048W	GSF2	0.209147	G
103B11	YML048W-A	YML048W-A	1.14962	A
103B12	YML037C	YML037C	0.635836	A
103B2	YML058C-A	YML058C-A	1.52427	A
103B3	YML056C	IMD4	0.45803	A
103B4	YML055W	SPC2	0.962746	A
103B5	YML054C	CYB2	0.843356	A
103B6	YML053C	YML053C	1.01316	A
103B7	YML052W	SUR7	0.488131	A
103B8	YML051W	GAL80	0.820316	A
103B9	YML050W	YML050W	0.583498	A
103C1	YML034W	SRC1	1.07369	A
103C10	YML020W	YML020W	0.685058	H
103C11	YML019W	OST6	-0.0538526	A
103C12	YML018C	YML018C	0.232721	A
103C2	YML035C-A	YML035C-A	0.598746	A
103C3	YML033W	YML033W	0.472661	G
103C5	YML030W	YML030W	0.764387	A
103C6	YML029W	YML029W	0.700136	A
103C7	YML028W	TSA1	0.919347	A
103D1	YML017W	PSP2	0.25326	G
103D10	YML008C	ERG6	0.0414085	A
103D11	YML007W	YAP1	-0.330046	G
103D12	YML006C	GIS4	-1.22422	L
103D2	YML016C	PPZ1	-0.756512	A
103D3	YML014W	YML014W	-1.82409	D
103D4	YML013W	YML013W	-2.49172	A
103D5	YML013C-A	YML013C-A	-5.44025	G
103D6	YML012W	ERV25	0.317492	A
103D7	YML011C	YML011C	-0.131653	A
103D8	YML010W-A	YML010W-A	0.43156	A
103D9	YML009C	MRPL39	-0.933015	A
103E1	YML005W	YML005W	-0.815629	A
103E10	YMR009W	YMR009W	0.617243	A
103E11	YMR010W	YMR010W	0.740764	A
103E12	YMR011W	HXT2	0.0960903	A
103E2	YML004C	GLO1	-0.991699	A
103E3	YML003W	YML003W	-0.0801588	A
103E4	YML002W	YML002W	0.67048	A
103E5	YMR002W	YMR002W	-0.0240866	A
103E6	YMR003W	YMR003W	-0.191923	A
103E7	YMR006C	PLB2	-0.161189	A
103E8	YMR007W	YMR007W	0.350043	A
103E9	YMR008C	PLB1	0.555068	E
103F1	YMR012W	CLU1	0.13472	A
103F10	YMR024W	MRPL3	-0.418718	G
103F11	YMR025W	YMR025W	0.401239	A
103F12	YMR026C	PEX12	0.189527	K
103F3	YMR016C	SOK2	-2.8227	A
103F4	YMR017W	SPO20	0.384838	A
103F5	YMR018W	YMR018W	0.44368	A
103F6	YMR019W	STB4	0.540237	A
103F7	YMR020W	FMS1	0.522839	A
103F8	YMR022W	QRI8	0.875864	A
103F9	YMR023C	MSS1	0.116419	A
103G1	YMR027W	HRT2	0.286222	A
103G10	YMR040W	YMR040W	0.270059	A
103G12	YMR042W	ARG80	-0.872834	A
103G2	YMR029C	YMR029C	0.417789	A
103G3	YMR030W	YMR030W	-0.104508	A
103G4	YMR031W-A	YMR031W-A	-0.636851	A
103G5	YMR031C	YMR031C	0.0214391	A
103G6	YMR032W	HOF1	-4.52045	G
103G7	YMR034C	YMR034C	0.332568	A
103G8	YMR036C	MIH1	0.302469	C
103G9	YMR039C	SUB1	0.505334	A
103H1	YMR044W	IOC4	0.367646	A
103H10	YMR153W	NUP53	-0.469122	A
103H11	YMR153C-A	YMR153C-A	-0.00169834	A
103H12	YMR155W	YMR155W	0.171288	A
103H2	YMR140W	YMR140W	-0.288138	A
103H4	YMR141C	YMR141C	-0.517005	A
103H6	YMR144W	YMR144W	-0.57671	A
103H7	YMR145C	YMR145C	-1.04121	A
103H8	YMR147W	YMR147W	-0.372281	A
103H9	YMR148W	YMR148W	0.0585115	A
104A1	YMR156C	TPP1	0.66921	A
104A10	YMR164C	MSS11	0.0741407	A
104A11	YMR166C	YMR166C	0.165181	A
104A12	YMR167W	MLH1	0.712878	A
104A2	YMR157C	YMR157C	0.399507	A
104A3	YMR158W-A	YMR158W-A	0.383914	G
104A5	YMR159C	APG16	0.428728	NA
104A6	YMR160W	YMR160W	0.855793	A
104A7	YMR161W	HLJ1	0.975632	A
104A8	YMR162C	YMR162C	0.733741	A
104A9	YMR163C	INP2	0.275671	A
104B1	YMR169C	ALD3	0.559242	A
104B11	YMR180C	CTL1	0.481341	G
104B12	YMR182C	RGM1	0.148129	A
104B2	YMR170C	ALD2	0.600857	A
104B3	YMR172C-A	YMR172C-A	-1.63388	A
104B4	YMR173W-A	YMR173W-A	0.683219	A
104B5	YMR174C	PAI3	0.933126	A
104B6	YMR175W	SIP18	-5.14574	H
104B7	YMR176W	ECM5	1.29133	A
104B8	YMR177W	MMT1	-2.89647	G
104B9	YMR178W	YMR178W	0.809901	A
104C1	YMR183C	SSO2	0.754757	A
104C10	YMR194W	RPL36A	0.0418634	A
104C11	YMR193C-A	YMR193C-A	0.259485	G
104C12	YMR195W	ICY1	0.130023	A
104C2	YMR184W	YMR184W	0.586213	A
104C3	YMR185W	YMR185W	0.618787	A
104C4	YMR186W	HSC82	0.181999	A
104C5	YMR187C	YMR187C	0.290334	B
104C6	YMR188C	YMR188C	NA	A
104C7	YMR189W	GCV2	-5.02658	NA
104C9	YMR192W	YMR192W	-0.0728025	A
104D1	YMR196W	YMR196W	-2.11609	A
104D10	YMR210W	YMR210W	-2.50987	J
104D11	YMR214W	SCJ1	-4.4475	A
104D12	YMR215W	YMR215W	0.466942	A
104D3	YMR199W	CLN1	-5.00714	A
104D4	YMR201C	RAD14	0.112992	A
104D6	YMR204C	INP1	1.15861	J
104D8	YMR206W	YMR206W	1.02535	A
104E1	YMR206C	YMR206C	0.242261	J
104E10	YMR232W	FUS2	0.545563	A
104E11	YMR233W	YMR233W	0.44	A
104E12	YMR234W	RNH1	0.496713	A
104E2	YMR219W	ESC1	0.220723	A
104E3	YMR221C	YMR221C	-4.94579	K
104E4	YMR222C	YMR222C	-4.59864	A
104E5	YMR223W	UBP8	0.572659	A
104E7	YMR225C	MRPL44	1.52427	A
104E8	YMR226C	YMR226C	-4.84518	A
104F1	YMR237W	YMR237W	0.697144	G
104F10	YMR247C	YMR247C	-4.93779	A
104F11	YMR250W	GAD1	-4.70148	A
104F12	YMR251W	YMR251W	0.367646	A
104F2	YMR238W	DFG5	-4.96356	G
104F3	YMR241W	YHM2	0.453424	A
104F4	YMR242C	RPL20A	1.08433	A
104F5	YMR243C	ZRC1	0.306009	A
104F6	YMR244W	YMR244W	-5.0971	K
104F7	YMR245W	YMR245W	-4.92971	K
104F8	YMR244C-A	YMR244C-A	-4.83554	K
104F9	YMR246W	FAA4	-5.04521	A
104G1	YMR251W-A	HOR7	-4.88667	K
104G10	YMR263W	SAP30	-0.0466353	A
104G11	YMR264W	CUE1	0.415081	A
104G12	YMR265C	YMR265C	0.351004	A
104G2	YMR252C	YMR252C	0.530059	A
104G3	YMR253C	YMR253C	-4.86974	A
104G4	YMR254C	YMR254C	0.891789	A
104G5	YMR255W	GFD1	0.51339	A
104G6	YMR258C	YMR258C	0.78289	A
104G7	YMR259C	YMR259C	-4.89541	A
104G9	YMR262W	YMR262W	-4.68658	NA
104H10	YMR283C	RIT1	-4.4934	G
104H11	YMR284W	YKU70	0.319891	A
104H12	YMR285C	NGL2	0.200053	A
104H2	YMR272C	SCS7	-0.573541	A
104H4	YMR273C	ZDS1	-5.06699	A
104H5	YMR274C	RCE1	-5.13183	A
104H6	YMR275C	BUL1	0.0580448	A
104H7	YMR276W	DSK2	0.831411	A
104H8	YMR278W	YMR278W	0.651688	A
104H9	YMR280C	CAT8	0.636246	A
105A1	YMR289W	YMR289W	0.222277	J
105A10	YMR300C	ADE4	-2.10816	K
105A12	YMR303C	ADH2	0.917882	A
105A3	YMR292W	GOT1	-0.662688	A
105A7	YMR295C	YMR295C	0.476309	A
105A9	YMR299C	YMR299C	0.249289	A
105B10	YNL335W	YNL335W	0.611335	A
105B11	YNL334C	SNO2	0.45852	A
105B12	YNL333W	SNZ2	0.556036	G
105B4	YMR306C-A	YMR306C-A	0.346364	A
105B6	YMR310C	YMR310C	-1.92328	K
105B7	YNL339C	YRF1-6	-1.88013	K
105B8	YNL338W	YNL338W	0.739276	A
105B9	YNL336W	COS1	-1.86466	A
105C1	YNL332W	THI12	0.326185	A
105C11	YNL320W	YNL320W	0.67534	A
105C12	YNL319W	YNL319W	0.654286	A
105C3	YNL328C	MDJ2	-1.89559	K
105C4	YNL327W	EGT2	-0.398745	A
105C5	YNL326C	YNL326C	0.495557	A
105C6	YNL324W	YNL324W	-1.79395	K
105C7	YNL325C	FIG4	0.0396675	A
105C9	YNL322C	KRE1	0.288845	A
105D10	YNL299W	TRF5	0.408	A
105D11	YNL298W	CLA4	0.0816127	G
105D12	YNL296W	KRE25	0.426503	A
105D2	YNL314W	DAL82	-2.06039	A
105D4	YNL307C	MCK1	-1.32019	A
105D5	YNL305C	YNL305C	-1.75708	A
105D6	YNL304W	YPT11	1.03455	A
105D8	YNL302C	RPS19B	0.308398	A
105D9	YNL301C	RPL18B	0.804481	A
105E10	YNL285W	YNL285W	-1.93612	A
105E11	YNL283C	WSC2	0.367646	A
105E12	YNL281W	HCH1	0.388373	A
105E5	YNL292W	PUS4	0.441193	A
105E6	YNL291C	MID1	0.692502	A
105E7	YNL289W	PCL1	-2.01786	K
105E8	YNL288W	CAF40	-1.83105	K
105F10	YNL264C	PDR17	0.590664	A
105F11	YNL259C	ATX1	1.1152	A
105F12	YNL257C	SIP3	1.52427	A
105F8	YNL266W	YNL266W	0.573124	A
105F9	YNL265C	IST1	0.970966	K
105G10	YOR005C	DNL4	-2.28564	K
105G11	YOR006C	YOR006C	-1.57917	A
105G12	YOR007C	SGT2	0.768679	A
105G3	YNL253W	YNL253W	0.269462	A
105G8	YOR002W	ALG6	-2.00304	K
105G9	YOR003W	YSP3	-1.98896	K
105H1	YOR008C	SLG1	-1.65894	G
105H10	YOR016C	ERP4	1.25153	A
105H11	YOR017W	PET127	0.712317	A
105H12	YOR018W	ROD1	0.538146	A
105H2	YOR009W	TIR4	0.867328	A
105H5	YOR011W	AUS1	0.516809	A
105H6	YOR012W	YOR012W	0.634264	A
105H7	YOR013W	YOR013W	-2.21059	K
105H9	YOR015W	YOR015W	0.832928	A
106A1	YOR019W	YOR019W	NA	A
106A10	YOR028C	CIN5	-1.24511	B
106A11	YOR029W	YOR029W	-3.3614	G
106A12	YOR030W	DFG16	-0.375775	A
106A2	YOR021C	YOR021C	0.883612	A
106A3	YOR022C	YOR022C	-2.19528	A
106A4	YOR023C	AHC1	0.469722	B
106A5	YOR024W	YOR024W	-0.575081	A
106A7	YOR025W	HST3	1.07916	G
106A8	YOR026W	BUB3	-2.40678	A
106A9	YOR027W	STI1	-1.34845	A
106B1	YOR031W	CRS5	0.384363	A
106B10	YOR040W	GLO4	0.215089	A
106B11	YOR041C	YOR041C	-0.979689	A
106B12	YOR042W	YOR042W	0.706552	A
106B2	YOR032C	HMS1	0.237624	A
106B3	YOR033C	EXO1	0.333534	G
106B4	YOR034C	AKR2	1.52427	A
106B5	YOR035C	SHE4	-1.98467	G
106B7	YOR037W	CYC2	-2.27513	A
106B8	YOR038C	HIR2	0.627292	A
106C1	YOR043W	WHI2	1.15424	A
106C10	YOR054C	YOR054C	0.969368	A
106C12	YOR058C	ASE1	0.0844288	G
106C2	YOR044W	YOR044W	0.288335	A
106C3	YOR045W	TOM6	0.564051	A
106C4	YOR047C	STD1	-1.56989	A
106C5	YOR049C	YOR049C	0.643432	A
106C6	YOR050C	YOR050C	0.773895	A
106C7	YOR051C	YOR051C	0.141693	G
106C8	YOR052C	YOR052C	0.256459	A
106C9	YOR053W	YOR053W	0.550342	A
106D1	YOR059C	YOR059C	-1.53801	A
106D10	YOR071C	YOR071C	-0.633382	A
106D11	YOR072W	YOR072W	0.592236	G
106D12	YOR073W	YOR073W	0.577918	G
106D2	YOR061W	CKA2	1.01942	A
106D3	YOR062C	YOR062C	1.28732	A
106D4	YOR064C	YNG1	-0.112352	A
106D5	YOR066W	YOR066W	0.802563	G
106D6	YOR067C	ALG8	-2.44147	A
106D7	YOR068C	YOR068C	-1.6486	A
106D8	YOR069W	VPS5	0.272943	A
106D9	YOR070C	GYP1	-2.09194	A
106E1	YOR076C	SKI7	-2.34319	A
106E10	YOR086C	YOR086C	0.350537	A
106E11	YOR087W	YOR087W	0.455663	A
106E12	YOR088W	YOR088W	-1.72663	A
106E2	YOR078W	BUD21	-3.09434	A
106E3	YOR079C	ATX2	-0.0635907	G
106E5	YOR081C	YOR081C	0.430161	G
106E6	YOR082C	YOR082C	-1.87484	G
106E7	YOR083W	YOR083W	0.0665841	B
106E8	YOR084W	YOR084W	0.104776	G
106E9	YOR085W	OST3	0.0498774	A
106F1	YOR089C	VPS21	-2.86394	G
106F10	YOR292C	YOR292C	0.725424	A
106F2	YOR090C	PTC5	0.176631	B
106F3	YOR091W	YOR091W	0.441677	A
106F4	YOR092W	ECM3	0.825983	A
106F5	YOR093C	YOR093C	0.690911	A
106F6	YOR094W	ARF3	-4.48806	G
106F7	YOR289W	YOR289W	0.367646	A
106F9	YOR291W	YOR291W	0.416397	A
106G1	YOR296W	YOR296W	0.12336	A
106G10	YOR307C	SLY41	0.0334611	A
106G11	YOR308C	SNU66	0.608782	A
106G12	YOR311C	HSD1	0.517981	G
106G2	YOR297C	TIM18	-2.17409	A
106G3	YOR298W	YOR298W	0.535206	A
106G4	YOR299W	BUD7	0.67744	A
106G5	YOR301W	RAX1	-0.0111606	A
106G6	YOR302W	YOR302W	-2.19528	G
106G7	YOR303W	CPA1	-0.08805	G
106G8	YOR304C-A	YOR304C-A	-2.07323	A
106G9	YOR304W	ISW2	0.747955	A
106H1	YOR312C	RPL20B	-1.84977	G
106H11	YOR324C	YOR324C	-1.50684	A
106H12	YOR327C	SNC2	-4.96233	A
106H2	YOR313C	SPS4	-1.58683	A
106H4	YOR314W	YOR314W	-0.0353699	A
106H5	YOR315W	YOR315W	-4.59804	G
106H6	YOR316C	COT1	-0.168693	A
106H7	YOR320C	YOR320C	-0.229209	A
106H8	YOR321W	PMT3	0.31872	A
106H9	YOR322C	YOR322C	0.484642	A
107A1	YOR328W	PDR10	0.936793	G
107A10	YOR344C	TYE7	0.591023	A
107A11	YOR346W	REV1	0.813162	A
107A12	YOR347C	PYK2	0.434551	A
107A2	YOR332W	VMA4	0.834423	A
107A3	YOR334W	MRS2	-2.98673	A
107A4	YOR337W	TEA1	-0.896052	A
107A5	YOR338W	YOR338W	0.624265	A
107A6	YOR339C	UBC11	0.0556225	A
107A8	YOR342C	YOR342C	-0.0217275	A
107A9	YOR343C	YOR343C	0.564104	A
107B1	YOR348C	PUT4	-1.38156	A
107B10	YOR358W	HAP5	-2.52992	A
107B11	YOR359W	YOR359W	0.0897078	A
107B2	YOR349W	CIN1	0.376847	A
107B3	YOR350C	MNE1	-4.50173	A
107B4	YOR351C	MEK1	0.446422	A
107B5	YOR352W	YOR352W	0.407694	A
107B6	YOR354C	MSC6	-2.57014	A
107B7	YOR355W	GDS1	0.360725	A
107B8	YOR356W	YOR356W	0.67304	A
107B9	YOR357C	GRD19	0.285354	A
107C1	YOR363C	PIP2	-5.36598	G
107C10	YOR380W	YOR380W	0.716341	A
107C11	YOR381W	FRE3	0.738295	A
107C12	YOR382W	FIT2	0.459759	A
107C2	YOR365C	YOR365C	-2.26705	A
107C3	YOR367W	SCP1	-1.72978	A
107C4	YOR368W	RAD17	-2.66893	A
107C5	YOR371C	YOR371C	-2.17074	A
107C6	YOR374W	ALD4	1.0286	A
107C7	YOR376W	YOR376W	0.896266	A
107C8	YOR377W	ATF1	0.758826	G
107C9	YOR378W	YOR378W	0.700557	A
107D1	YOR383C	FIT3	-1.2211	A
107D10	YOL007C	CSI2	-1.95695	A
107D11	YOL008W	YOL008W	-2.86485	B
107D12	YOL011W	PLB3	0.214296	A
107D2	YOR384W	FRE5	-0.675752	A
107D3	YOR385W	YOR385W	-2.01021	A
107D4	YOR386W	PHR1	0.640399	A
107D6	YOL002C	YOL002C	0.194999	A
107D7	YOL003C	YOL003C	0.30037	A
107D9	YOL006C	TOP1	-2.22796	G
107E1	YOL012C	HTZ1	-4.85222	G
107E10	YOL024W	YOL024W	1.29352	G
107E11	YOL025W	LAG2	0.0715244	A
107E12	YOL027C	YOL027C	0.422497	G
107E2	YOL013C	HRD1	0.109168	A
107E3	YOL014W	YOL014W	0.686352	A
107E4	YOL015W	YOL015W	0.656846	A
107E5	YOL017W	YOL017W	0.577387	A
107E6	YOL018C	TLG2	-2.45569	A
107E7	YOL019W	TOS7	1.52427	G
107E8	YOL020W	TAT2	1.08716	G
107E9	YOL023W	IFM1	0.3442	A
107F1	YOL028C	YAP7	0.78755	A
107F11	YOL042W	NGL1	1.161	A
107F12	YOL043C	NTG2	-0.952589	A
107F2	YOL029C	YOL029C	0.144192	A
107F3	YOL030W	YOL030W	-0.619995	A
107F4	YOL031C	YOL031C	0.979061	A
107F5	YOL032W	YOL032W	0.606529	A
107F6	YOL035C	YOL035C	0.551011	A
107F7	YOL036W	YOL036W	0.0397447	A
107F8	YOL037C	YOL037C	0.520176	A
107F9	YOL039W	RPP2A	0.473465	A
107G1	YOL044W	PEX15	-2.07433	K
107G10	YOL053C-A	YOL053C-A	0.503851	G
107G11	YOL053W	YOL053W	0.270256	A
107G12	YOL054W	YOL054W	-0.000814516	A
107G2	YOL045W	YOL045W	-1.74624	A
107G3	YOL046C	YOL046C	-1.53354	A
107G4	YOL047C	YOL047C	0.53672	A
107G6	YOL049W	GSH2	-1.87193	G
107G7	YOL050C	YOL050C	-2.72838	A
107G8	YOL051W	GAL11	-3.08192	A
107G9	YOL052C	SPE2	0.487893	A
107H10	YOL063C	YOL063C	-1.76264	A
107H11	YOL064C	MET22	-2.306	A
107H12	YOL065C	INP54	0.392649	A
107H2	YOL056W	GPM3	-0.0965037	A
107H4	YOL057W	YOL057W	0.235993	A
107H5	YOL058W	ARG1	-1.99952	G
107H6	YOL059W	GPD2	-2.49372	A
107H7	YOL060C	AMI3	-1.62478	A
107H8	YOL061W	PRS5	0.859863	A
107H9	YOL062C	APM4	0.126395	A
108A1	YOL067C	RTG1	0.979061	A
108A10	YOL080C	REX4	-0.564896	A
108A12	YOL082W	CVT19	0.813162	A
108A2	YOL068C	HST1	1.08716	A
108A3	YOL070C	YOL070C	-1.2211	A
108A4	YOL071W	YOL071W	-2.72838	A
108A5	YOL072W	THP1	-5.54338	K
108A6	YOL075C	YOL075C	0.30037	A
108A7	YOL076W	MDM20	-4.9117	G
108A9	YOL079W	YOL079W	0.700557	J
108B1	YOL084W	PHM7	0.624265	A
108B10	YPL264C	YPL264C	0.328433	A
108B11	YPL263C	KEL3	0.640399	A
108B2	YOL085C	YOL085C	0.936793	A
108B3	YPL274W	SAM3	-1.92767	A
108B4	YPL273W	SAM4	0.487893	A
108B5	YPL272C	YPL272C	0.446422	A
108B6	YPL270W	MDL2	-2.33019	A
108B7	YPL269W	KAR9	-0.509146	A
108B8	YPL267W	YPL267W	0.758826	A
108B9	YPL265W	DIP5	1.29352	A
108C1	YPL260W	YPL260W	-4.63824	A
108C10	YPL249C	YPL249C	0.520176	A
108C11	YPL248C	GAL4	1.161	A
108C12	YPL247C	YPL247C	0.235993	A
108C2	YPL261C	YPL261C	0.194999	G
108C3	YPL259C	APM1	0.716341	A
108C4	YPL258C	THI21	0.459759	A
108C5	YPL257W	YPL257W	-0.0742574	A
108C6	YPL256C	CLN2	-0.0965037	G
108C8	YPL253C	VIK1	0.0207414	A
108C9	YPL250C	ICY2	-1.3524	A
108D1	YPL246C	YPL246C	-0.0217275	A
108D10	YPL230W	USV1	-1.48804	A
108D11	YPL229W	YPL229W	-2.98673	G
108D12	YPL227C	ALG5	-1.96528	A
108D3	YPL244C	HUT1	0.577387	A
108D4	YPL241C	CIN2	0.254574	A
108D5	YPL240C	HSP82	0.177524	A
108D6	YPL239W	YAR1	-0.296781	G
108D7	YPL236C	YPL236C	0.834423	A
108D8	YPL234C	TFP3	0.53672	A
108D9	YPL232W	SSO1	-0.619995	A
108E1	YPL226W	NEW1	0.285354	A
108E10	YPL213W	LEA1	-4.58044	G
108E11	YPL212C	PUS1	0.686352	A
108E12	YPL208W	YPL208W	-1.1823	A
108E2	YPL225W	YPL225W	-0.952589	J
108E3	YPL223C	GRE1	0.0397447	A
108E4	YPL222W	YPL222W	0.314651	A
108E5	YPL221W	BOP1	0.407694	A
108E6	YPL220W	RPL1A	0.0897078	A
108E7	YPL219W	PCL8	0.270256	A
108E8	YPL216W	YPL216W	0.738295	A
108E9	YPL214C	THI6	1.0286	A
108F1	YPL207W	YPL207W	0.0715244	A
108F10	YPL197C	YPL197C	-0.175907	A
108F11	YPL196W	YPL196W	-2.0228	A
108F12	YPL195W	APL5	-2.3579	A
108F2	YPL206C	YPL206C	0.473465	A
108F3	YPL205C	YPL205C	0.67304	A
108F4	YPL203W	TPK2	0.896266	A
108F5	YPL202C	AFT2	1.52427	A
108F6	YPL201C	YPL201C	0.591023	A
108F7	YPL200W	CSM4	0.144192	A
108F8	YPL199C	YPL199C	-0.14772	G
108F9	YPL198W	RPL7B	0.392649	A
108G1	YPL194W	DDC1	0.503851	A
108G10	YPL184C	YPL184C	-2.57014	A
108G11	YPL181W	YPL181W	-0.841605	G
108G12	YPL182C	YPL182C	0.859863	A
108G2	YPL193W	RSA1	0.126395	G
108G3	YPL192C	PRM3	0.0556225	A
108G4	YPL191C	YPL191C	-1.68637	A
108G5	YPL189W	GUP2	-0.233891	A
108G7	YPL187W	MF(ALPHA)1	0.214296	A
108G8	YPL185W	YPL185W	0.606529	A
108H1	YPL180W	SHD7	-2.45569	G
108H10	YPL168W	YPL168W	-0.0487281	A
108H11	YPL167C	REV3	0.3442	G
108H12	YPL166W	YPL166W	0.109168	A
108H2	YPL179W	PPQ1	-0.120714	A
108H4	YPL178W	CBC2	-5.88565	G
108H5	YPL177C	CUP9	0.422497	A
108H6	YPL176C	YPL176C	0.551011	A
108H7	YPL174C	NIP100	-1.04941	A
108H8	YPL171C	OYE3	0.564104	A
108H9	YPL170W	YPL170W	0.78755	A
109A1	YPL165C	YPL165C	-0.0217275	A
109A10	YPL155C	KIP2	1.08716	A
109A11	YPL154C	PEP4	0.834423	A
109A12	YPL152W	RRD2	-1.14095	G
109A2	YPL164C	MLH3	0.520176	A
109A3	YPL163C	SVS1	1.52427	A
109A4	YPL162C	YPL162C	0.3442	A
109A5	YPL161C	BEM4	-0.336047	A
109A6	YPL159C	YPL159C	0.0556225	A
109A7	YPL157W	YPL157W	-0.233891	A
109A8	YPL156C	PRM4	-0.72788	A
109B1	YPL150W	YPL150W	-0.509146	A
109B10	YPL136W	YPL136W	0.503851	A
109B11	YPL135W	ISU1	-0.564896	A
109B12	YPL133C	YPL133C	0.270256	A
109B2	YPL149W	APG5	0.434551	A
109B3	YPL147W	PXA1	-0.0742574	A
109B4	YPL145C	KES1	0.0207414	A
109B5	YPL144W	YPL144W	-0.262682	A
109B6	YPL141C	YPL141C	0.606529	A
109B7	YPL140C	MKK2	0.979061	A
109B8	YPL139C	UME1	1.161	A
109B9	YPL138C	YPL138C	0.564104	A
109C1	YPL130W	SPO19	-0.175907	A
109C10	YPL116W	HOS3	-0.120714	A
109C11	YPL115C	BEM3	0.473465	A
109C12	YPL114W	YPL114W	0.758826	A
109C2	YPL129W	ANC1	-0.675752	NA
109C3	YPL127C	HHO1	-0.0487281	A
109C5	YPL123C	RNY1	0.126395	A
109C6	YPL121C	MEI5	0.407694	A
109C7	YPL120W	VPS30	0.551011	A
109C9	YPL118W	MRP51	-0.952589	G
109D1	YPL113C	YPL113C	-0.000814516	B
109D10	YPL103C	YPL103C	0.936793	A
109D11	YPL101W	YPL101W	-0.896052	A
109D2	YPL112C	YPL112C	0.109168	J
109D3	YPL111W	CAR1	0.161243	A
109D4	YPL110C	YPL110C	0.640399	G
109D5	YPL109C	YPL109C	0.859863	A
109D6	YPL108W	YPL108W	0.254574	A
109D7	YPL107W	YPL107W	-0.0965037	A
109D8	YPL106C	SSE1	0.656846	A
109D9	YPL105C	YPL105C	0.78755	A
109E1	YPL100W	YPL100W	-0.465839	G
109E10	YBR175W	YBR175W	-0.37531	G
109E11	YBR176W	ECM31	0.716341	A
109E12	YBR177C	EHT1	1.29352	A
109E2	YPL099C	YPL099C	0.214296	A
109E3	YPL098C	YPL098C	-0.841605	G
109E5	YPL096W	PNG1	0.328433	A
109E6	YPL095C	YPL095C	0.422497	A
109E7	YPL092W	SSU1	0.67304	A
109E8	YBR173C	UMP1	0.285354	A
109E9	YBR174C	YBR174C	0.446422	A
109F1	YBR178W	YBR178W	-1.04941	A
109F10	YBR188C	NTC20	0.686352	A
109F11	YBR194W	YBR194W	-0.296781	G
109F12	YBR195C	MSI1	0.30037	A
109F2	YBR180W	DTR1	0.177524	A
109F3	YBR181C	RPS6B	-1.00526	A
109F4	YBR182C	SMP1	0.144192	A
109F5	YBR183W	YPC1	0.0715244	A
109F6	YBR184W	YBR184W	0.235993	A
109F7	YBR185C	MBA1	1.0286	A
109F8	YBR186W	PCH2	0.577387	A
109F9	YBR187W	YBR187W	0.896266	A
109G1	YBR197C	YBR197C	-0.14772	A
109G11	YBR209W	YBR209W	-0.204868	A
109G12	YBR210W	YBR210W	0.591023	A
109G2	YBR199W	KTR4	0.0397447	A
109G3	YBR200W	BEM1	-1.28859	G
109G4	YBR201W	DER1	0.459759	A
109G5	YBR203W	YBR203W	0.360725	A
109G6	YBR204C	YBR204C	0.813162	A
109G7	YBR205W	KTR3	0.0897078	A
109G8	YBR206W	YBR206W	0.487893	A
109G9	YBR207W	FTH1	0.624265	A
109H10	YBR220C	YBR220C	-0.619995	A
109H11	YBR221C	PDB1	-0.418902	G
109H12	YBR222C	FAT2	0.738295	A
109H2	YBR213W	MET8	0.314651	A
109H4	YBR214W	SDS24	0.194999	A
109H5	YBR215W	HPC2	-0.788788	G
109H6	YBR216C	YBR216C	0.700557	A
109H7	YBR217W	APG12	0.376847	A
109H8	YBR218C	PYC2	0.392649	A
109H9	YBR219C	YBR219C	0.53672	A
110A1	YBR223C	YBR223C	0.234493	G
110A11	YBR233W	PBP2	0.772791	G
110A12	YBR235W	YBR235W	0.842252	G
110A2	YBR224W	YBR224W	-0.299451	A
110A3	YBR225W	YBR225W	-0.182541	A
110A4	YBR226C	YBR226C	-1.69022	G
110A5	YBR227C	MCX1	0.0294754	G
110A6	YBR228W	SLX1	0.427645	A
110A7	YBR229C	ROT2	0.682326	A
110A8	YBR230C	YBR230C	0.709969	A
110A9	YBR231C	AOR1	-0.708865	G
110B1	YBR238C	YBR238C	-0.555381	A
110B10	YBR249C	ARO4	0.987976	A
110B11	YBR250W	YBR250W	1.09452	A
110B12	YBR255W	YBR255W	-0.416604	G
110B2	YBR239C	YBR239C	0.213567	A
110B3	YBR240C	THI2	-1.43051	G
110B4	YBR241C	YBR241C	0.551583	A
110B5	YBR242W	YBR242W	0.324093	G
110B6	YBR244W	GPX2	0.41462	A
110B7	YBR245C	ISW1	0.589907	A
110B8	YBR246W	YBR246W	-0.0336313	A
110B9	YBR248C	HIS7	-0.337207	A
110C1	YBR258C	YBR258C	0.695288	A
110C10	YDR049W	YDR049W	-0.129028	A
110C11	YDR051C	YDR051C	0.63761	G
110C12	YDR055W	PST1	0.907904	A
110C2	YBR259W	YBR259W	-0.08301	A
110C3	YBR260C	RGD1	1.03704	A
110C4	YBR261C	YBR261C	0.00890595	A
110C5	YBR262C	YBR262C	0.870443	A
110C6	YBR263W	SHM1	0.652444	G
110C7	YBR264C	YPT10	1.16722	A
110C8	YBR266C	YBR266C	-0.265836	A
110C9	YBR267W	YBR267W	-1.26167	G
110D1	YDR056C	YDR056C	0.282613	A
110D10	YDR069C	DOA4	NA	A
110D11	YDR070C	YDR070C	0.0609064	G
110D12	YDR072C	IPT1	1.52427	A
110D2	YDR057W	YDR057W	0.0455238	A
110D3	YDR059C	UBC5	0.0760679	A
110D4	YDR061W	YDR061W	0.564152	A
110D5	YDR063W	YDR063W	0.946326	A
110D6	YDR065W	YDR065W	NA	A
110D7	YDR066C	YDR066C	0.267786	G
110D8	YDR067C	YDR067C	-0.155273	G
110D9	YDR068W	DOS2	0.728362	G
110E1	YDR073W	SNF11	0.799316	A
110E10	YDR089W	YDR089W	0.399894	A
110E11	YDR090C	YDR090C	0.25284	B
110E12	YDR092W	UBC13	0.146429	B
110E2	YDR075W	PPH3	0.476908	A
110E3	YDR076W	RAD55	-0.238197	G
110E4	YDR078C	YDR078C	0.53808	G
110E6	YDR080W	VPS41	-1.67756	G
110E7	YDR083W	RRP8	-1.55884	G
110E8	YDR084C	YDR084C	0.438483	A
110E9	YDR085C	AFR1	0.129223	B
110F1	YDR093W	YDR093W	0.522196	A
110F10	YDR102C	YDR102C	0.490882	A
110F11	YDR104C	SPO71	0.310915	G
110F12	YDR105C	YDR105C	0.354196	A
110F2	YDR094W	YDR094W	0.748873	A
110F3	YDR095C	YDR095C	0.338468	A
110F4	YDR096W	GIS1	0.576899	A
110F5	YDR097C	MSH6	0.604458	A
110F6	YDR098C	GRX3	0.506563	G
110F7	YDR099W	BMH2	-0.374882	G
110F8	YDR100W	YDR100W	0.450786	A
110F9	YDR101C	YDR101C	-1.45054	G
110G1	YDR107C	YDR107C	1.29923	G
110G10	YDR120C	TRM1	-0.210407	A
110G11	YDR121W	DPB4	0.178344	A
110G12	YDR122W	KIN1	0.668994	G
110G2	YDR108W	GSG1	-0.104883	A
110G3	YDR109C	YDR109C	-0.461523	A
110G4	YDR110W	FOB1	-0.0116323	A
110G5	YDR111C	YDR111C	0.162661	G
110G6	YDR112W	YDR112W	0.82164	G
110G7	YDR116C	YDR116C	0.369856	B
110G8	YDR117C	YDR117C	0.195134	A
110G9	YDR119W	YDR119W	0.29673	A
110H1	YDR123C	INO2	0.0945629	A
110H10	YDR132C	YDR132C	0.113208	A
110H11	YDR133C	YDR133C	0.621482	A
110H12	YDR134C	YDR134C	-1.06749	A
110H2	YDR124W	YDR124W	-0.0599547	A
110H4	YDR125C	ECM18	0.463525	A
110H5	YDR126W	PSL10	-0.607947	A
110H6	YDR128W	YDR128W	-1.81877	A
110H7	YDR129C	SAC6	-4.03516	G
110H8	YDR130C	FIN1	-1.15559	A
110H9	YDR131C	YDR131C	0.385212	A
111A1	YDR135C	YCF1	0.322051	A
111A10	YDR146C	SWI5	-2.98563	G
111A12	YDR338C	YDR338C	-0.351982	A
111A2	YDR136C	YDR136C	-1.46265	G
111A3	YDR137W	RGP1	0.161536	A
111A4	YER055C	HIS1	-1.26941	G
111A5	YDR139C	RUB1	0.736242	A
111A7	YDR142C	PEX7	1.52427	K
111A8	YDR143C	SAN1	0.339804	A
111A9	YDR144C	MKC7	0.415295	A
111B10	YDR357C	YDR357C	-0.263333	A
111B11	YDR358W	GGA1	-0.229073	A
111B2	YDR344C	YDR344C	0.181124	A
111B3	YDR345C	HXT3	0.359376	A
111B4	YDR346C	YDR346C	0.444659	A
111B5	YDR348C	YDR348C	0.305758	A
111B6	YDR349C	YPS7	-1.13464	A
111B7	YDR351W	SBE2	0.566746	A
111B8	YDR352W	YDR352W	0.0984484	G
111C1	YDR360W	YDR360W	0.120376	A
111C11	YDR379W	RGA2	-0.127748	A
111C12	YDR380W	ARO10	-0.160374	NA
111C4	YDR368W	YPR1	0.533718	A
111C7	YDR371W	YDR371W	0.848981	A
111C8	YDR372C	YDR372C	0.0378293	A
111C9	YDR374C	YDR374C	0.227352	A
111D12	YDR395W	SXM1	-0.30497	A
111D2	YDR383C	YDR383C	0.620172	A
111D3	YDR384C	YDR384C	0.476969	A
111D4	YDR385W	EFT2	-0.011453	A
111D5	YDR386W	MUS81	0.287599	A
111D6	YDR387C	YDR387C	0.890457	A
111D7	YDR388W	RVS167	-0.969897	G
111D8	YDR389W	SAC7	-0.455564	A
111D9	YDR391C	YDR391C	1.05233	A
111E1	YDR399W	HPT1	-0.194446	A
111E11	YDR411C	YDR411C	0.269746	A
111E12	YDR414C	ERD1	-1.30947	A
111E2	YDR400W	URH1	1.26652	A
111E3	YDR401W	YDR401W	0.431089	A
111E4	YDR402C	DIT2	0.639823	A
111E5	YDR403W	DIT1	0.551129	A
111E7	YDR406W	PDR15	0.938763	A
111E8	YDR408C	ADE8	-0.837521	A
111E9	YDR409W	YDR409W	0.494589	A
111F1	YDR415C	YDR415C	0.582589	A
111F10	YDR428C	YDR428C	0.0755888	A
111F11	YDR430C	YDR430C	-0.0982352	A
111F12	YDR431W	YDR431W	-0.40059	A
111F2	YDR418W	RPL12B	-3.251	G
111F3	YDR419W	RAD30	0.659616	A
111F4	YDR420W	HKR1	0.795266	A
111F5	YDR421W	ARO80	0.514138	A
111F6	YDR422C	SIP1	0.397106	A
111F7	YDR423C	CAD1	1.13155	A
111F8	YDR425W	YDR425W	0.677975	A
111F9	YDR426C	YDR426C	0.378575	B
111G12	YEL010W	YEL010W	0.0140701	A
111G2	YDR433W	KRE22	-1.77355	A
111G3	YDR435C	PPM1	-0.774743	A
111G4	YDR436W	PPZ2	0.989712	A
111G5	YEL001C	YEL001C	0.693624	A
111G6	YEL003W	GIM4	-0.50798	A
111G7	YEL005C	VAB2	0.82329	A
111G8	YEL006W	YEL006W	0.251176	A
111G9	YEL007W	TOS9	-0.071302	A
111H10	YEL023C	YEL023C	0.0567144	A
111H12	YEL025C	SRI1	-0.0399504	A
111H2	YEL014C	YEL014C	0.202341	A
111H4	YEL015W	YEL015W	0.141099	A
111H5	YEL016C	YEL016C	0.599453	A
111H6	YEL017C-A	PMP2	0.761711	A
111H7	YEL017W	YEL017W	0.460537	A
111H9	YEL020C	YEL020C	0.711847	A
112A1	YEL027W	CUP5	0.305309	A
112A10	YEL040W	UTR2	-0.19017	G
112A11	YEL041W	YEL041W	-0.219076	G
112A2	YEL028W	YEL028W	-0.247681	G
112A3	YEL030W	ECM10	0.462855	G
112A4	YEL031W	SPF1	-0.532877	A
112A5	YEL033W	YEL033W	1.16217	A
112A6	YER016W	BIM1	-0.64392	A
112A7	YEL037C	RAD23	0.702225	A
112A8	YEL038W	UTR4	-1.06424	G
112A9	YEL039C	CYC7	-0.108867	G
112B1	YEL042W	GDA1	0.332896	NA
112B10	YEL051W	VMA8	-3.73297	NA
112B11	YEL052W	AFG1	0.133263	A
112B12	YEL053C	MAK10	0.318884	A
112B2	YEL043W	YEL043W	0.259778	A
112B3	YER028C	YER028C	0.50734	B
112B4	YEL045C	YEL045C	-1.52245	G
112B5	YEL046C	GLY1	-1.58341	G
112B6	YEL047C	YEL047C	0.167353	G
112B7	YEL048C	YEL048C	0.687884	G
112B8	YEL049W	PAU2	0.201678	G
112C1	YEL054C	RPL12A	0.0464892	A
112C10	YEL065W	SIT1	-0.314756	G
112C11	YEL066W	HPA3	-0.354087	A
112C12	YEL067C	YEL067C	0.437234	A
112C2	YEL056W	HAT2	0.593439	A
112C3	YEL057C	YEL057C	0.411803	A
112C4	YEL059W	YEL059W	0.222169	A
112C5	YEL060C	PRB1	1.08854	A
112C6	YEL061C	CIN8	-2.32562	G
112C7	YEL062W	NPR2	1.52427	A
112C8	YEL063C	CAN1	-2.26374	G
112C9	YEL064C	YEL064C	0.00882751	A
112D1	YEL068C	YEL068C	0.365361	A
112D10	YER010C	YER010C	-0.439417	B
112D11	YER011W	TIR1	0.116419	A
112D12	YER019W	ISC1	-1.73177	A
112D2	YEL071W	DLD3	0.60934	G
112D4	YER001W	MNN1	0.626943	A
112D5	YER002W	YER002W	0.718034	A
112D6	YER004W	YER004W	0.425757	A
112D7	YER005W	YND1	0.449667	A
112D8	YER007C-A	YER007C-A	0.289954	A
112D9	YER007W	PAC2	0.0976635	A
112E1	YER019C-A	SBH2	0.861852	A
112E10	YER041W	YEN1	0.0782651	A
112E11	YER042W	MXR1	0.150798	A
112E12	YER044C-A	MEI4	-0.394129	G
112E2	YER020W	GPA2	-0.484842	A
112E3	YER024W	YAT2	0.642428	A
112E4	YER030W	YER030W	0.381292	A
112E5	YER033C	ZRG8	1.2946	A
112E6	YER034W	YER034W	0.814756	A
112E7	YER035W	EDC2	0.898454	B
112E8	YER038W-A	YER038W-A	0.566507	A
112F1	YER045C	ACA1	0.980737	A
112F10	YER056C-A	RPL34A	0.579708	A
112F11	YER058W	PET117	-0.27644	A
112F12	YER059W	PCL6	-0.0625024	A
112F2	YER046W-A	YER046W-A	0.740357	A
112F3	YER047C	SAP1	0.835895	A
112F4	YER048C	CAJ1	0.476653	A
112F5	YER049W	YER049W	0.938585	G
112F6	YER051W	YER051W	0.789762	A
112F7	YER053C	YER053C	0.761451	A
112F8	YER054C	GIP2	0.491094	A
112F9	YER056C	FCY2	0.0300946	A
112G1	YER060W	FCY21	0.396704	A
112G10	YER072W	VTC1	-0.134367	A
112G11	YER073W	ALD5	-0.01238	A
112G12	YER074W	RPS24A	-0.587771	G
112G2	YER062C	HOR2	0.659366	A
112G3	YER065C	ICL1	1.03018	A
112G4	YER067W	YER067W	0.539665	A
112G5	YER067C-A	YER067C-A	0.553478	G
112G6	YER044C	ERG28	NA	A
112G7	YER068C-A	YER068C-A	NA	A
112G8	YER069W	ARG5	-1.3296	K
112G9	YER071C	YER071C	0.275609	A
112H1	YER075C	PTP3	0.0624213	A
112H10	YER087C-A	SBH1	0.183921	A
112H11	YGR123C	PPT1	-0.0355946	A
112H12	YGR124W	ASN2	-0.161755	A
112H2	YER080W	YER080W	0.243127	A
112H4	YER081W	SER3	0.523511	G
112H6	YER084W	YER084W	0.674912	A
112H7	YER085C	YER085C	0.349036	G
112H8	YER086W	ILV1	-1.70112	A
112H9	YER087W	YER087W	-3.16447	NA
113A1	YGR125W	YGR125W	0.598442	A
113A10	YGR136W	YGR136W	1.08288	A
113A11	YGR137W	YGR137W	0.85371	A
113A12	YGR138C	YGR138C	1.02369	G
113A2	YGR126W	YGR126W	-0.00839432	G
113A3	YGR127W	YGR127W	0.49306	G
113A4	YGR129W	SYF2	-1.47463	A
113A5	YGR130C	YGR130C	0.889498	G
113A6	YGR131W	YGR131W	0.509918	G
113A7	YGR132C	PHB1	-0.403505	A
113A8	YGR133W	PEX4	0.752851	K
113A9	YGR135W	PRE9	-2.40691	G
113B10	YGR151C	YGR151C	0.807973	A
113B11	YGR152C	RSR1	1.52427	A
113B12	YGR153W	TOS10	0.158803	A
113B4	YGR142W	BTN2	0.315553	A
113B5	YGR143W	SKN1	-0.107205	A
113B6	YGR144W	THI4	-0.0309677	A
113B7	YGR146C	YGR146C	1.15738	A
113B8	YGR148C	RPL24B	0.28563	A
113B9	YGR149W	YGR149W	0.695398	G
113C1	YGR154C	YGR154C	0.0349255	A
113C10	YGR168C	YGR168C	0.82987	A
113C11	YGR169C	YGR169C	0.175481	G
113C12	YGR170W	PSD2	-1.09034	A
113C2	YGR157W	CHO2	-1.22209	A
113C5	YGR161C	YGR161C	0.711105	A
113C7	YGR164W	YGR164W	0.0850644	A
113C9	YGR166W	KRE11	-0.190838	A
113D1	YGR173W	YGR173W	0.270194	A
113D10	YGR189C	CRH1	-0.361025	G
113D11	YGR192C	TDH3	0.34603	G
113D12	YGR193C	PDX1	0.66725	G
113D3	YGR177C	ATF2	0.52665	A
113D4	YGR178C	PBP1	0.973877	A
113D5	YGR181W	TIM13	0.212655	A
113D6	YGR182C	YGR182C	-0.779372	A
113D8	YGR184C	UBR1	0.362934	A
113D9	YGR187C	HGH1	-0.496449	G
113E1	YGR194C	XKS1	0.395379	G
113E10	YGR207C	YGR207C	0.931249	A
113E11	YGR208W	SER2	0.634121	B
113E12	YGR209C	TRX2	0.254156	A
113E2	YGR196C	FYV8	0.78037	A
113E3	YGR197C	SNG1	0.425414	A
113E4	YGR199W	PMT6	0.410902	A
113E5	YGR200C	ELP2	-1.97753	A
113E6	YGR202C	PCT1	0.0136744	A
113E7	YGR203W	YGR203W	0.379386	A
113E8	YGR205W	YGR205W	0.463723	B
113E9	YGR206W	YGR206W	0.193206	A
113F1	YGR212W	YGR212W	-0.161539	A
113F10	YHL040C	ARN1	0.437276	G
113F11	YHL037C	YHL037C	-0.0837513	A
113F12	YHL036W	MUP3	0.32967	A
113F2	YGR213C	RTA1	0.141182	A
113F3	YGR214W	RPS0A	-1.8826	G
113F4	YGR217W	CCH1	-0.320587	A
113F5	YHL047C	TAF1	0.234953	A
113F6	YHL046C	YHL046C	-0.220654	A
113F7	YHL045W	YHL045W	0.067416	B
113F8	YHL044W	YHL044W	-1.95724	G
113F9	YHL043W	ECM34	0.542773	A
113G1	YHL035C	YHL035C	0.681616	A
113G10	YHL022C	SPO11	0.301037	A
113G11	YHL020C	OPI1	-1.32368	A
113G12	YHL019C	APM2	-1.43533	G
113G2	YHL034C	SBP1	-0.133332	G
113G3	YHL033C	RPL8A	-0.549737	A
113G4	YHL032C	GUT1	1.29021	A
113G5	YHL031C	GOS1	-0.250127	A
113G6	YHL028W	WSC4	0.649048	A
113G7	YHL027W	RIM101	-1.14018	A
113G8	YHL026C	YHL026C	0.450134	A
113G9	YHL023C	YHL023C	0.570248	A
113H1	YHL017W	YHL017W	0.556761	A
113H10	YHR001W-A	QCR10	0.615984	A
113H11	YHR012W	VPS29	-0.280901	A
113H12	YHR013C	ARD1	-0.833342	A
113H2	YHL014C	YLF2	-0.0592041	A
113H4	YHL013C	YHL013C	0.0510532	A
113H5	YHL012W	YHL012W	0.123225	A
113H6	YHL010C	YHL010C	0.478012	G
113H7	YHL009C	YAP3	0.731411	A
113H8	YHL008C	YHL008C	0.105013	A
113H9	YHL006C	SHU1	0.583889	A
114A1	YHR014W	SPO13	0.176362	A
114A10	YHR033W	YHR033W	0.570045	A
114A11	YHR034W	YHR034W	-1.59584	A
114A12	YHR035W	YHR035W	-0.0188776	A
114A3	YHR018C	ARG4	-2.41939	A
114A4	YHR021C	RPS27B	-3.88556	A
114A5	YHR022C	YHR022C	0.496275	A
114A6	YHR028C	DAP2	0.233462	A
114A7	YHR029C	YHR029C	0.543744	G
114A8	YHR030C	SLT2	-0.594647	A
114A9	YHR031C	RRM3	-0.225624	A
114B1	YHR037W	PUT2	0.583124	A
114B10	YHR049W	YHR049W	0.721538	A
114B11	YHR049C-A	YHR049C-A	0.838061	A
114B12	YHR050W	SMF2	0.022894	A
114B4	YHR039C	MSC7	1.03252	A
114B5	YHR043C	DOG2	0.467529	A
114B6	YHR044C	DOG1	0.454426	A
114B7	YHR046C	YHR046C	0.690223	A
114B8	YHR047C	AAP1'	-1.52032	A
114B9	YHR048W	YHR048W	0.001771	A
114C1	YHR057C	CYP2	0.901674	A
114C10	YHR079C	IRE1	-0.168693	A
114C11	YHR080C	YHR080C	0.07223	A
114C12	YHR081W	YHR081W	-1.84334	A
114C3	YHR061C	GIC1	0.252401	A
114C4	YHR066W	SSF1	0.297289	A
114C5	YHR073W	OSH3	0.596997	A
114C6	YHR075C	PPE1	0.356213	A
114C7	YHR076W	YHR076W	-1.87942	G
114C8	YHR077C	NMD2	0.983204	A
114C9	YHR078W	YHR078W	0.193417	A
114D1	YHR082C	KSP1	-0.446951	A
114D10	YHR100C	YHR100C	-1.23072	A
114D11	YHR103W	SBE22	0.613478	A
114D12	YHR104W	GRE3	0.417851	A
114D2	YHR086W	NAM8	-0.0442573	A
114D3	YHR087W	YHR087W	0.211977	A
114D4	YHR092C	HXT4	0.704805	A
114D5	YHR093W	AHT1	0.645416	A
114D6	YHR094C	HXT1	0.0902187	A
114D7	YHR095W	YHR095W	0.109313	A
114D8	YHR096W	YHR096W	-0.0698518	A
114D9	YHR097C	YHR097C	0.430557	G
114E1	YHR105W	YHR105W	-1.5802	A
114E10	YHR115C	YHR115C	1.09058	A
114E11	YHR116W	YHR116W	-2.35892	A
114E12	YHR117W	TOM71	1.52427	A
114E2	YHR106W	TRR2	0.481452	A
114E3	YHR108W	GGA2	0.677667	G
114E4	YHR109W	CTM1	0.0410317	G
114E5	YHR110W	ERP5	0.372165	G
114E6	YHR111W	YHR111W	-1.9931	G
114E7	YHR112C	YHR112C	0.528487	A
114E8	YHR113W	YHR113W	0.402674	A
114E9	YHR114W	BZZ1	0.340092	G
114F1	YHR121W	YHR121W	0.765316	A
114F10	YHR134W	WSS1	0.160425	A
114F11	YHR135C	YCK1	-0.361174	A
114F12	YHR136C	SPL2	-0.322407	A
114F2	YHR123W	EPT1	0.0566429	A
114F3	YHR124W	NDT80	-1.77276	G
114F4	YHR125W	YHR125W	-1.195	A
114F5	YHR126C	YHR126C	0.743259	A
114F6	YHR129C	ARP1	-1.15529	A
114F7	YHR130C	YHR130C	-1.75981	A
114F8	YHR132C	ECM14	0.143655	A
114F9	YHR133C	YHR133C	0.126209	G
114G1	YHR137W	ARO9	0.793018	G
114G10	YHR154W	ESC4	-0.0921723	A
114G11	YHR155W	YHR155W	0.325182	A
114G12	YHR156C	YHR156C	0.663077	A
114G2	YHR138C	YHR138C	0.512404	G
114G3	YHR139C	SPS100	0.282816	G
114G4	YHR139C-A	YHR139C-A	1.29617	G
114G5	YHR142W	CHS7	-0.115333	G
114G6	YHR143W	YHR143W	-0.197027	A
114G7	YHR151C	YHR151C	0.311697	A
114G8	YHR152W	SPO12	0.26767	A
114G9	YHR153C	SPO16	0.630883	A
114H1	YHR157W	REC104	0.86478	A
114H10	YHR179W	OYE2	-0.401788	A
114H11	YHR182W	YHR182W	0.941224	A
114H2	YHR158C	KEL1	0.817102	A
114H4	YHR159W	YHR159W	0.387835	A
114H5	YHR160C	PEX18	1.16389	A
114H6	YHR161C	YAP1801	0.557111	A
114H7	YHR163W	SOL3	0.441258	A
114H8	YHR167W	THP2	-4.39797	G
114H9	YHR178W	STB5	-0.253867	A
115A1	YHR184W	SSP1	0.172374	G
115A10	YHR206W	SKN7	-0.224793	A
115A11	YHR207C	YHR207C	0.460537	A
115A12	YHR209W	YHR209W	0.262574	NA
115A2	YHR189W	YHR189W	-0.485625	A
115A3	YHR195W	NVJ1	0.503184	A
115A4	YHR198C	YHR198C	1.29822	A
115A5	YHR199C	YHR199C	0.395996	G
115A6	YHR200W	RPN10	0.227352	A
115A7	YHR202W	YHR202W	0.139761	A
115A8	YHR203C	RPS4B	-1.84507	A
115A9	YHR204W	HTM1	0.561829	A
115B1	YHR210C	YHR210C	0.410668	A
115B10	YCL011C	GBP2	0.0543214	A
115B11	YCL012W	YCL012W	0.94465	A
115B12	YCL013W	YCL013W	0.618853	A
115B2	YCL001W	RER1	0.868583	A
115B4	YCL002C	YCL002C	0.306773	A
115B5	YCL003W	YCL003W	-4.29161	NA
115B6	YCL005W	YCL005W	0.0204271	A
115C1	YCL014W	BUD3	0.424506	A
115C10	YCL034W	YCL034W	-0.0463158	A
115C11	YCL036W	YCL036W	0.473828	A
115C12	YCL037C	SRO9	-2.01349	A
115C2	YCL016C	DCC1	-1.54147	A
115C3	YCL024W	KCC4	0.708273	A
115C4	YCL025C	AGP1	0.10567	A
115C5	YCL026C	YCL026C	1.52427	NA
115C6	YCL027W	FUS1	-0.00041647	NA
115C7	YCL028W	RNQ1	-0.0931271	A
115C8	YCL029C	BIK1	-0.74668	A
115C9	YCL033C	YCL033C	-0.071302	A
115D1	YCL039W	YCL039W	0.74703	A
115D10	YCL050C	APA1	-0.357792	A
115D11	YCL051W	LRE1	-0.141702	A
115D12	YCL055W	KAR4	0.820149	A
115D2	YCL040W	GLK1	0.986409	A
115D3	YCL042W	YCL042W	0.770336	A
115D4	YCL044C	YCL044C	0.487785	A
115D5	YCL045C	YCL045C	0.12285	NA
115D6	YCL046W	YCL046W	0.0697283	A
115D7	YCL047C	YCL047C	0.247401	A
115D8	YCL048W	YCL048W	0.380943	A
115D9	YCL049C	YCL049C	0.649956	A
115E1	YCL056C	YCL056C	0.291892	A
115E10	YCR004C	YCP4	0.905858	A
115E11	YCR005C	CIT2	-0.802134	NA
115E12	YCR006C	YCR006C	-0.640524	A
115E2	YCL057W	PRD1	0.435898	A
115E3	YCL060C	YCL060C	0.206455	G
115E4	YCL061C	MRC1	-0.282059	A
115E5	YCL062W	YCL062W	-1.31631	G
115E6	YCL063W	YCL063W	-0.168693	A
115E7	YCL064C	CHA1	-0.116023	A
115E8	YCL069W	YCL069W	0.587561	A
115E9	YCR001W	YCR001W	-0.441489	A
115F1	YCR007C	YCR007C	0.534952	A
115F10	YCR019W	MAK32	-0.906509	A
115F11	YCR020C	PET18	-0.020665	A
115F12	YCR020C-A	MAK31	1.03555	A
115F2	YCR008W	SAT4	-1.46401	K
115F3	YCR009C	RVS161	0.66714	A
115F4	YCR010C	ADY2	0.188844	A
115F5	YCR011C	ADP1	0.797248	A
115F6	YCR014C	POL4	0.601704	A
115F7	YCR015C	YCR015C	0.635612	G
115F8	YCR016W	YCR016W	0.0868308	A
115F9	YCR017C	YCR017C	0.726121	A
115G1	YCR021C	HSP30	0.34952	A
115G10	YLR133W	CKI1	0.156502	A
115G11	YLR134W	PDC5	0.57464	A
115G12	YLR135W	SLX4	0.51898	A
115G2	YCR022C	YCR022C	0.36542	A
115G3	YCR023C	YCR023C	0.549042	A
115G4	YLR420W	URA4	-0.532468	A
115G5	YLR451W	LEU3	-0.31954	A
115G6	YLR126C	YLR126C	0.319994	A
115G7	YLR128W	YLR128W	-0.397246	A
115G8	YLR130C	ZRT2	0.278111	A
115G9	YLR131C	ACE2	-1.21969	A
115H1	YLR136C	TIS11	0.680805	A
115H10	YLR152C	YLR152C	1.09322	A
115H11	YLR154C	YLR154C	0.0389954	A
115H12	YLR164W	YLR164W	1.16613	A
115H2	YLR137W	YLR137W	0.333782	A
115H4	YLR138W	NHA1	0.840876	A
115H5	YLR142W	PUT1	0.693624	A
115H6	YLR143W	YLR143W	-0.196606	A
115H7	YLR149C	YLR149C	-0.585977	A
115H8	YLR150W	STM1	-0.25262	A
115H9	YLR151C	PCD1	0.447657	A
116A1	YLR165C	PUS5	0.482939	A
116A10	YLR177W	YLR177W	0.533482	A
116A2	YLR168C	MSF1'	0.100658	A
116A3	YLR169W	YLR169W	-0.0160529	A
116A4	YLR170C	APS1	0.173435	A
116A5	YLR171W	YLR171W	-0.880944	A
116A6	YLR172C	DPH5	-0.236986	A
116A7	YLR173W	YLR173W	0.330975	A
116A8	YLR174W	IDP2	0.576695	A
116A9	YLR176C	RFX1	-0.267158	A
116B10	YLR189C	UGT51	0.347988	A
116B11	YLR190W	YLR190W	-0.304605	A
116B12	YLR191W	PEX13	0.548933	K
116B5	YLR183C	TOS4	0.925441	A
116B6	YLR184W	YLR184W	-0.591658	A
116B7	YLR185W	RPL37A	-0.533762	A
116B8	YLR187W	YLR187W	0.516221	A
116C1	YLR193C	YLR193C	-0.206612	A
116C10	YLR210W	CLB4	0.15624	A
116C11	YLR211C	YLR211C	0.316499	A
116C12	YLR213C	CRR1	0.590965	A
116C2	YLR194C	YLR194C	0.119903	A
116C3	YLR199C	YLR199C	0.0631113	A
116C6	YLR205C	YLR205C	0.746952	A
116C7	YLR206W	ENT2	0.233864	A
116C8	YLR207W	HRD3	0.625891	A
116C9	YLR209C	PNP1	0.382047	A
116D1	YLR214W	FRE1	0.642372	A
116D11	YLR227C	ADY4	0.285919	A
116D12	YKL001C	MET14	0.365233	A
116D2	YLR216C	CPR6	0.270128	A
116D3	YLR217W	YLR217W	0.772569	A
116D4	YLR218C	YLR218C	0.562787	A
116D5	YLR219W	MSC3	0.080199	A
116D6	YLR220W	CCC1	0.825193	A
116D7	YLR221C	YLR221C	0.414263	A
116D8	YLR224W	YLR224W	0.801456	A
116D9	YLR225C	YLR225C	0.847804	G
116E1	YKL006W	RPL14A	-1.13936	A
116E10	YKL023W	YKL023W	0.607307	A
116E11	YKL025C	PAN3	0.440131	A
116E12	YKL026C	GPX1	0.253719	A
116E2	YKL007W	CAP1	-0.118471	A
116E3	YKL008C	LAC1	-1.18293	A
116E4	YKL009W	MRT4	-1.36115	G
116E5	YKL010C	UFD4	0.882407	A
116E6	YKL011C	CCE1	-0.387373	A
116E7	YKL015W	PUT3	0.724199	A
116E8	YKL017C	HCS1	0.454013	A
116E9	YKL020C	SPT23	0.66032	A
116F1	YKL027W	YKL027W	-0.651279	A
116F10	YKL041W	VPS24	-3.78177	G
116F11	YKL043W	PHD1	0.191377	A
116F12	YKL044W	YKL044W	0.398239	A
116F2	YKL029C	MAE1	0.468024	A
116F3	YKL031W	YKL031W	0.49905	A
116F4	YKL032C	IXR1	0.67647	A
116F5	YKL034W	YKL034W	0.689992	A
116F6	YKL037W	YKL037W	0.00617334	A
116F7	YKL038W	RGT1	0.0286583	A
116F8	YKL039W	PTM1	0.428471	A
116F9	YKL040C	NFU1	-0.483144	A
116G1	YKL046C	YKL046C	-0.176251	A
116G10	YKL057C	NUP120	-0.996436	A
116G11	YKL061W	YKL061W	-0.146717	A
116G12	YKL062W	MSN4	-0.0697536	A
116G2	YKL047W	YKL047W	0.210936	G
116G3	YKL048C	ELM1	-1.82761	A
116G4	YKL050C	YKL050C	0.301736	K
116G5	YKL051W	YKL051W	-0.0422497	NA
116G6	YKL053W	YKL053W	-0.703142	A
116G8	YKL055C	OAR1	-0.939851	A
116G9	YKL056C	YKL056C	-1.22313	A
116H1	YKL063C	YKL063C	0.138028	A
116H10	YKL072W	STB6	1.15359	A
116H11	YKL073W	LHS1	0.705619	A
116H12	YKL074C	MUD2	0.0463032	L
116H2	YKL064W	MNR2	-0.34602	L
116H4	YKL065C	YET1	-0.0935518	A
116H5	YKL066W	YKL066W	1.0784	G
116H6	YKL067W	YNK1	1.01855	A
116H7	YKL069W	YKL069W	1.28673	A
116H8	YKL070W	YKL070W	1.52427	A
116H9	YKL071W	YKL071W	0.968444	A
117A1	YKL075C	YKL075C	-2.2558	A
117A10	YKL090W	YKL090W	0.193206	A
117A2	YKL076C	YKL076C	-0.0837513	A
117A3	YKL077W	YKL077W	0.615984	A
117A4	YKL079W	SMY1	-0.496449	A
117A5	YKL080W	VMA5	-2.06048	G
117A7	YKL084W	YKL084W	0.450134	A
117A8	YKL085W	MDH1	-0.833342	A
117A9	YKL086W	YKL086W	-0.107205	A
117B10	YKL103C	LAP4	0.681616	A
117B11	YKL105C	YKL105C	-0.00839432	A
117B12	YKL106W	AAT1	0.598442	A
117B2	YKL094W	YJU3	0.66725	A
117B3	YKL096W	CWP1	0.437276	A
117B4	YKL097C	YKL097C	0.556761	H
117B6	YKL098W	YKL098W	0.0850644	A
117B7	YKL100C	YKL100C	0.649048	A
117B8	YKL101W	HSL1	-1.52359	A
117B9	YKL102C	YKL102C	0.123225	A
117C1	YKL107W	YKL107W	0.28563	A
117C10	YKL121W	YKL121W	-1.0468	A
117C11	YKL123W	YKL123W	-0.161539	NA
117C12	YKL124W	SSH4	-0.280901	A
117C2	YKL109W	HAP4	-0.320587	A
117C3	YKL110C	KTI12	-1.22209	A
117C4	YKL113C	RAD27	-2.55741	A
117C5	YKL116C	PRR1	0.570248	A
117C6	YKL117W	SBA1	1.02369	A
117C7	YKL118W	YKL118W	-1.8826	A
117C8	YKL119C	VPH2	0.711105	A
117C9	YKL120W	OAC1	0.254156	A
117D1	YKL126W	YPK1	-1.53893	A
117D10	YKL137W	YKL137W	0.82987	G
117D11	YKL140W	TGL1	0.234953	A
117D12	YKL142W	MRP8	0.34603	A
117D2	YKL127W	PGM1	0.410902	A
117D3	YKL128C	PMU1	0.395379	A
117D4	YKL129C	MYO3	0.973877	A
117D5	YKL130C	SHE2	0.85371	A
117D6	YKL131W	YKL131W	1.15738	A
117D7	YKL132C	RMA1	1.29021	G
117D8	YKL133C	YKL133C	0.731411	A
117D9	YKL136W	YKL136W	0.175481	A
117E1	YKL143W	LTV1	-2.51794	G
117E10	YKL157W	APE2	0.49306	A
117E11	YKL158W	YKL158W	0.158803	C
117E12	YKL159C	RCN1	0.0136744	NA
117E2	YKL146W	YKL146W	0.509918	A
117E3	YKL147W	YKL147W	-0.133332	A
117E4	YKL148C	SDH1	-2.13644	A
117E5	YKL149C	DBR1	-0.0592041	A
117E6	YKL150W	MCR1	1.52427	A
117E7	YKL151C	YKL151C	1.08288	A
117E9	YKL156W	RPS27A	-0.220654	A
117F1	YKL160W	YKL160W	-0.665033	A
117F10	YKL174C	YKL174C	0.583889	A
117F11	YKL175W	ZRT3	0.270194	A
117F12	YKL176C	LST4	-2.23592	G
117F2	YKL161C	YKL161C	0.362934	A
117F3	YKL162C	YKL162C	0.105013	A
117F4	YKL163W	PIR3	0.212655	J
117F5	YKL164C	PIR1	0.807973	A
117F6	YKL166C	TPK3	0.463723	A
117F7	YKL167C	MRP49	0.067416	A
117F8	YKL168C	KKQ8	0.542773	A
117F9	YKL171W	YKL171W	0.634121	A
117G1	YKL179C	YKL179C	0.478012	A
117G10	YGR033C	YGR033C	0.32967	A
117G11	YGR034W	RPL26B	0.315553	A
117G12	YGR035C	YGR035C	0.752851	A
117G2	YKL183W	LOT5	0.141182	A
117G3	YKL184W	SPE1	0.301037	A
117G4	YKL185W	ASH1	0.52665	A
117G5	YKL187C	YKL187C	-0.888674	A
117G6	YKL188C	PXA2	0.889498	A
117G7	YKL190W	CNB1	0.0510532	A
117G8	YGR027C	RPS25A	-1.69355	A
117G9	YGR031W	YGR031W	0.0349255	A
117H10	YGR049W	SCM4	-0.190838	A
117H11	YGR051C	YGR051C	0.379386	A
117H2	YGR037C	ACB1	-0.250127	A
117H4	YGR039W	YGR039W	0.425414	A
117H5	YGR041W	BUD9	0.931249	A
117H6	YGR042W	YGR042W	0.695398	A
117H8	YGR044C	RME1	0.78037	A
117H9	YGR045C	YGR045C	-0.0309677	A
118A10	YGR067C	YGR067C	-0.494773	A
118A11	YGR068C	YGR068C	0.242349	A
118A12	YGR069W	YGR069W	0.326792	A
118A6	YGR059W	SPR3	-0.137749	NA
118A7	YGR061C	ADE6	-0.304776	A
118A8	YGR064W	YGR064W	-0.984142	A
118A9	YGR066C	YGR066C	0.278808	A
118B1	YGR070W	ROM1	-0.860276	A
118B10	YGR084C	MRP13	0.783638	A
118B11	YGR085C	RPL11B	0.0778538	G
118B12	YGR087C	PDC6	0.397708	A
118B2	YGR071C	YGR071C	-0.676149	A
118B3	YGR072W	UPF3	0.139466	A
118B4	YGR077C	PEX8	1.06619	K
118B7	YGR079W	YGR079W	0.50616	A
118B8	YGR080W	TWF1	0.176937	A
118B9	YGR081C	YGR081C	-0.735936	A
118C1	YGR088W	CTT1	-0.168693	A
118C10	YGR109C	CLB6	0.753287	G
118C11	YGR111W	YGR111W	0.729838	A
118C12	YGR112W	SHY1	-0.801272	A
118C2	YGR096W	YGR096W	0.344132	A
118C3	YGR097W	ASK10	-0.265367	A
118C4	YGR100W	MDR1	0.572031	A
118D1	YGR118W	RPS23A	-1.03664	G
118D10	YOR106W	VAM3	-1.13715	B
118D11	YOR107W	RGS2	0.836259	A
118D12	YOR108W	YOR108W	0.65999	A
118D2	YGR121C	MEP1	0.31147	A
118D3	YGR122W	YGR122W	0.866424	A
118D4	YOR097C	YOR097C	0.457067	A
118D5	YOR099W	KTR1	0.218622	A
118D6	YOR100C	CRC1	0.362514	A
118D7	YOR101W	RAS1	0.414746	A
118D8	YOR104W	YOR104W	0.158729	A
118D9	YOR105W	YOR105W	0.442152	A
118E1	YOR109W	INP53	1.00455	A
118E10	YOR123C	LEO1	0.641179	A
118E11	YOR124C	UBP2	0.953731	G
118E12	YOR126C	IAH1	0.909251	A
118E2	YOR111W	YOR111W	0.677182	A
118E3	YOR112W	YOR112W	-0.44459	A
118E4	YOR113W	AZF1	-0.393561	A
118E5	YOR114W	YOR114W	0.0996235	A
118E6	YOR115C	TRS33	0.586904	A
118E7	YOR118W	YOR118W	-0.0564807	A
118E8	YOR120W	GCY1	0.524348	A
118E9	YOR121C	YOR121C	-0.0254011	G
118F1	YOR129C	YOR129C	1.52427	NA
118F10	YOR138C	YOR138C	0.708535	A
118F11	YOR139C	YOR139C	1.27727	A
118F3	YOR131C	YOR131C	-0.348831	A
118F4	YOR132W	VPS17	0.691693	A
118F5	YOR133W	EFT1	-0.613833	A
118F6	YOR134W	BAG7	0.0423356	NA
118F8	YOR136W	IDH2	-1.08385	NA
118F9	YOR137C	YOR137C	0.623213	A
118G1	YOR142W	LSC1	-0.0833688	A
118G10	YOR164C	YOR164C	0.557328	J
118G11	YOR165W	YOR165W	1.14327	A
118G12	YOR166C	YOR166C	0.812536	A
118G2	YOR144C	EFD1	-0.233281	A
118G3	YOR152C	YOR152C	-0.20091	A
118G4	YOR153W	PDR5	-0.108968	J
118G5	YOR154W	YOR154W	0.0601213	A
118G6	YOR156C	NFI1	0.603448	A
118G7	YOR161C	YOR161C	0.196483	A
118G8	YOR162C	YRR1	0.472212	A
118G9	YOR163W	DDP1	0.380422	A
118H1	YOR167C	RPS28A	-0.552649	G
118H10	YOR179C	YOR179C	0.0218278	A
118H11	YOR180C	DCI1	0.5421	A
118H12	YOR182C	RPS30B	-0.922108	A
118H2	YOR170W	YOR170W	0.294956	G
118H4	YOR171C	LCB4	-0.00219081	A
118H5	YOR172W	YOR172W	0.261067	A
118H6	YOR173W	YOR173W	0.120125	A
118H8	YOR177C	YOR177C	0.429712	A
118H9	YOR178C	GAC1	0.488264	A
119A10	YOR193W	YOR193W	-1.94253	E
119A11	YOR195W	SLK19	-2.59472	A
119A12	YOR196C	LIP5	-1.41337	A
119A2	YOR184W	SER1	-0.100364	A
119A3	YOR185C	GSP2	0.323152	A
119A4	YOR186W	YOR186W	-0.12599	A
119A5	YOR188W	MSB1	0.0734477	A
119A6	YOR189W	YOR189W	0.388942	A
119A7	YOR190W	SPR1	0.420345	A
119A8	YOR191W	RIS1	-2.31252	A
119A9	YOR192C	YOR192C	-2.23048	A
119B1	YOR197W	YOR197W	0.245054	A
119B11	YOR213C	SAS5	-1.38679	A
119B12	YOR214C	YOR214C	-0.183631	NA
119B2	YOR198C	BFR1	0.0405471	A
119B5	YOR201C	PET56	0.14874	A
119B6	YOR202W	HIS3	0.885994	A
119B9	YOR208W	PTP2	-1.29248	A
119C1	YOR215C	YOR215C	0.372414	A
119C10	YOR227W	YOR227W	0.308955	A
119C11	YOR228C	YOR228C	-0.0771763	G
119C12	YOR229W	WTM2	0.130311	A
119C2	YOR216C	RUD3	-0.213716	A
119C3	YOR219C	STE13	0.580335	A
119C4	YOR220W	YOR220W	0.552967	A
119C6	YOR222W	ODC2	0.850525	A
119C7	YOR223W	YOR223W	1.52427	G
119C8	YOR225W	YOR225W	0.827545	A
119C9	YOR226C	ISU2	0.166088	A
119D1	YOR230W	WTM1	-2.07181	G
119D10	YOR242C	SSP2	0.0570158	A
119D11	YOR243C	YOR243C	-1.49452	A
119D12	YOR245C	DGA1	-0.0513113	A
119D2	YOR231W	MKK1	0.278435	A
119D3	YOR233W	KIN4	0.355573	A
119D4	YOR234C	RPL33B	0.201822	A
119D5	YOR235W	YOR235W	-2.01936	J
119D6	YOR237W	HES1	0.630061	A
119D7	YOR238W	YOR238W	0.521458	A
119D8	YOR239W	ABP140	0.708395	A
119D9	YOR240W	YOR240W	-1.82178	A
119E1	YOR246C	YOR246C	-0.312583	A
119E10	YOR264W	YOR264W	-0.0228653	A
119E11	YOR277C	YOR277C	-0.943148	E
119E2	YOR247W	SRL1	-0.273456	A
119E3	YOR248W	TOS11	-1.47684	A
119E4	YOR251C	YOR251C	-2.64663	A
119E5	YOR252W	YOR252W	0.594747	G
119E6	YOR253W	YOR253W	1.08066	A
119E7	YOR255W	YOR255W	1.28849	A
119E8	YOR258W	YOR258W	0.183313	D
119E9	YOR263C	YOR263C	0.0210779	A
119F1	YOR280C	YOR280C	0.223296	A
119F10	YJL215C	YJL215C	0.458925	A
119F11	YJL214W	HXT8	0.112915	A
119F12	YJL212C	OPT1	0.33859	K	Note: This is a PEX2 deletion in the commercial library
119F2	YOR283W	YOR283W	0.293315	A
119F3	YOR284W	YOR284W	0.504566	A
119F4	YOR285W	YOR285W	0.538507	D
119F5	YOR286W	YOR286W	0.749937	A
119F6	YOR288C	MPD1	0.971193	A
119F7	YJL218W	YJL218W	0.804753	A
119F8	YJL217W	YJL217W	0.611697	A
119F9	YJL216C	YJL216C	0.0927886	A
119G1	YJL210W	PEX2	0.645525	A	Note: This is an OPT1 deletion in the commercial library
119G10	YJL190C	RPS22A	-2.76713	G
119G11	YJL188C	BUD19	-2.7068	G
119G12	YJL187C	SWE1	0.404519	A
119G2	YJL211C	YJL211C	0.776516	K
119G3	YJL208C	NUC1	0.433108	A
119G4	YJL207C	YJL207C	0.261874	A
119G5	YJL199C	YJL199C	0.664224	A
119G6	YJL198W	PHO90	1.15551	A
119G7	YJL197W	UBP12	0.692727	A
119G8	YJL193W	YJL193W	-0.00124077	A
119G9	YJL192C	YJL192C	0.473077	A
119H1	YJL186W	MNN5	0.488008	A
119H10	YJL171C	YJL171C	0.679164	A
119H11	YJL170C	ASG7	0.727847	A
119H12	YJL169W	YJL169W	-2.55082	G
119H2	YJL185C	YJL185C	0.445099	A
119H4	YJL183W	MNN11	-3.06153	D
119H5	YJL181W	YJL181W	0.566559	A
119H6	YJL182C	YJL182C	0.928379	A
119H8	YJL178C	YJL178C	1.02115	A
120A1	YJL168C	SET2	-0.312583	E
120A10	YJL154C	VPS35	0.827545	A
120A11	YJL153C	INO1	0.552967	A
120A12	YJL152W	YJL152W	-0.00124077	A
120A2	YJL166W	QCR8	0.445099	A
120A3	YJL164C	TPK1	NA	A
120A4	YJL162C	YJL162C	0.130311	A
120A5	YJL160C	YJL160C	0.727847	A
120A6	YJL159W	HSP150	-1.86324	A
120A7	YJL158C	CIS3	0.885994	A
120A8	YJL157C	FAR1	1.52427	A
120A9	YJL155C	FBP26	0.645525	A
120B1	YJL150W	YJL150W	0.420345	A
120B10	YJL135W	YJL135W	0.112915	A
120B11	YJL134W	LCB3	-0.0228653	A
120B12	YJL133W	MRS3	0.308955	A
120B2	YJL149W	YJL149W	-0.44293	A
120B3	YJL148W	RPA34	-0.598867	A
120B4	YJL147C	YJL147C	0.566559	A
120B5	YJL146W	IDS2	-0.0513113	A
120B6	YJL145W	YJL145W	0.749937	A
120B7	YJL144W	YJL144W	1.15551	A
120B9	YJL142C	YJL142C	0.538507	A
120C1	YJL132W	YJL132W	0.201822	A
120C10	YLR330W	CHS5	-0.489875	A
120C11	YLR331C	YLR331C	NA	A
120C12	YLR332W	MID2	0.388942	A
120C2	YJL131C	YJL131C	NA	A
120C4	YLR324W	YLR324W	0.355573	A
120C5	YLR325C	RPL38	0.372414	A
120C6	YLR326W	YLR326W	0.630061	D
120C7	YLR327C	YLR327C	0.692727	A
120C8	YLR328W	YLR328W	0.708395	A
120C9	YLR329W	REC102	0.245054	A
120D1	YLR333C	RPS25B	0.166088	A
120D10	YLR395C	COX8	0.458925	A
120D11	YOR364W	YOR364W	-0.213716	A
120D12	YLR398C	SKI2	0.183313	A
120D2	YLR335W	NUP2	-0.943148	A
120D3	YOR300W	YOR300W	-0.183631	A
120D4	YMR038C	LYS7	-0.395534	A
120D5	YLR341W	SPO77	0.473077	A
120D6	YLR342W	FKS1	-2.76713	G
120D7	YLR391W	YLR391W	1.02115	G
120D8	YLR392C	YLR392C	0.776516	A
120E1	YLR006C	SSK1	1.08066	A
120E10	YLR410W	VIP1	0.0210779	A
120E11	YLR412W	YLR412W	-0.100364	A
120E12	YLR413W	YLR413W	0.0927886	A
120E2	YLR400W	YLR400W	-0.0771763	A
120E3	YLR401C	YLR401C	0.223296	A
120E4	YLR402W	YLR402W	-2.47325	A
120E6	YLR404W	YLR404W	NA	A
120E7	YLR405W	YLR405W	0.664224	A
120E8	YLR407W	YLR407W	0.928379	A
120E9	YLR408C	YLR408C	0.679164	A
120F1	YLR414C	YLR414C	0.293315	A
120F10	YDR150W	NUM1	0.0405471	A
120F11	YDR151C	CTH1	-0.273456	A
120F12	YDR152W	YDR152W	-0.353629	A
120F2	YLR415C	YLR415C	0.0734477	A
120F3	YLR416C	YLR416C	-0.12599	A
120F4	YLR417W	VPS36	-1.04545	A
120F5	YLR418C	CDC73	-0.708158	A
120F6	YLR421C	RPN13	0.594747	A
120F7	YDR147W	EKI1	1.28849	A
120F8	YDR148C	KGD2	-1.25655	G
120F9	YDR149C	YDR149C	-0.541844	A
120G1	YDR153C	YDR153C	0.278435	A
120G10	YDR163W	YDR163W	0.404519	A
120G11	YDR165W	YDR165W	-0.154216	A
120G12	YDR169C	STB3	0.14874	A
120G2	YDR154C	YDR154C	0.323152	A
120G3	YDR155C	CPH1	0.433108	A
120G4	YDR156W	RPA14	-2.25006	G
120G5	YDR157W	YDR157W	0.33859	A
120G6	YDR158W	HOM2	-1.47684	A
120G8	YDR161W	TCI1	0.504566	A
120G9	YDR162C	NBP2	-0.658238	A
120H1	YDR171W	HSP42	0.488008	A
120H10	YDR185C	YDR185C	0.971193	A
120H11	YDR186C	YDR186C	0.850525	A
120H12	YDR191W	HST4	0.521458	G
120H4	YDR178W	SDH4	-2.05316	A
120H5	YDR179C	YDR179C	0.0570158	A
120H6	YDR179W-A	YDR179W-A	0.611697	A
120H7	YDR181C	SAS4	0.804753	A
120H8	YDR183W	PLP1	0.580335	A
120H9	YDR184C	ATC1	0.261874	A
121A1	YDR192C	NUP42	0.198351	A
121A10	YDR207C	UME6	-1.7756	A
121A11	YDR209C	YDR209C	0.543912	A
121A12	YDR210W	YDR210W	0.988751	G
121A2	YDR193W	YDR193W	-0.364658	A
121A3	YDR195W	REF2	-2.77307	H
121A4	YDR198C	YDR198C	-0.203276	A
121A5	YDR199W	YDR199W	0.170761	A
121A6	YDR200C	YDR200C	-0.946015	H
121A7	YDR203W	YDR203W	1.20914	A
121A8	YDR204W	COQ4	NA	A
121A9	YDR206W	EBS1	0.0859137	A
121B1	YDR213W	UPC2	0.0590348	A
121B10	YDR221W	YDR221W	0.0337586	A
121B11	YDR222W	YDR222W	0.116419	A
121B12	YDR223W	YDR223W	0.308613	A
121B2	YDR214W	YDR214W	0.429197	A
121B3	YDR215C	YDR215C	-2.07192	G
121B4	YDR216W	ADR1	-2.52949	G
121B5	YDR217C	RAD9	0.518598	A
121B6	YDR218C	SPR28	0.743379	A
121B7	YDR219C	YDR219C	0.144083	A
121B8	YDR220C	YDR220C	0.330528	A
121C1	YDR225W	HTA1	-0.301915	A
121C10	YLR027C	AAT2	-0.505503	G
121C11	YML001W	YPT7	-2.28797	G
121C12	YMR266W	RSN1	1.07568	A
121C3	YDR229W	YDR229W	-0.0780066	A
121C4	YDR231C	COX20	NA	G
121C5	YDR233C	YDR233C	0.284839	A
121C6	YDR234W	LYS4	0.66526	A
121C8	YDR239C	YDR239C	0.638598	A
121D1	YNL330C	RPD3	-1.9824	A
121D10	YER052C	HOM3	0.231384	A
121D11	YER057C	HIG1	0.860861	A
121D12	YER060W-A	FCY22	1.52427	A
121D2	YOR305W	YOR305W	-0.114621	A
121D3	YOR369C	RPS12	-0.000289578	A
121D5	YDR127W	ARO1	-1.79905	A
121D6	YEL004W	YEA4	NA	A
121D8	YER032W	FIR1	0.710807	A
121E10	YHL007C	STE20	0.56531	A
121E11	YHL005C	YHL005C	0.921922	A
121E12	YHL003C	LAG1	0.586543	A
121E2	YER066C-A	YER066C-A	-0.15755	A
121E3	YER079W	YER079W	0.469455	A
121E4	YHL042W	YHL042W	0.492446	A
121E5	YHL041W	YHL041W	0.356508	A
121E6	YHL030W	ECM29	0.687121	A
121E7	YHL029C	YHL029C	0.382249	A
121E8	YHL021C	YHL021C	0.611474	A
121E9	YHL016C	DUR3	0.822377	A
121F10	YKL178C	STE3	NA	A
121F2	YHR150W	YHR150W	0.260239	G
121F3	YHR176W	YHR176W	-0.0364526	A
121F5	YCL032W	STE50	0.406657	A
121F6	YCR002C	CDC10	0.783247	A
121F7	YKL068W	NUP100	0.44805	A
122A1	YLR258W	GSY2	1.27926	G
122A10	YLR268W	SEC22	-3.14665	A
122A11	YLR269C	YLR269C	-0.240392	G
122A4	YLR262C	YPT6	0.608162	A
122A5	YLR263W	RED1	0.269987	A
122A6	YLR264W	RPS28B	-1.539	H
122A7	YLR265C	NEJ1	0.733645	A
122A8	YLR266C	YLR266C	0.28654	A
122A9	YLR267W	BOP2	0.0536706	A
122B1	YLR271W	YLR271W	0.47753	A
122B11	YLR285W	YLR285W	-0.0351208	A
122B12	YLR287C	YLR287C	-0.272083	A
122B2	YLR273C	PIG1	0.627679	A
122B3	YLR278C	YLR278C	-0.116216	A
122B4	YLR279W	YLR279W	0.756379	G
122B5	YLR280C	YLR280C	1.14544	A
122B6	YLR281C	YLR281C	0.679933	A
122B7	YLR282C	YLR282C	0.493767	A
122B8	YLR283W	YLR283W	0.421061	A
122B9	YLR284C	ECI1	-0.0098085	A
122C1	YLR287C-A	RPS30A	-0.621699	A
122C10	YLR299W	ECM38	0.036268	H
122C11	YLR300W	EXG1	-0.561001	H
122C12	YLR303W	MET17	-0.313271	A
122C2	YLR288C	MEC3	0.86965	A
122C3	YLR289W	GUF1	0.546643	A
122C4	YLR290C	YLR290C	0.575933	A
122C5	YLR292C	SEC72	-0.452973	A
122C6	YLR294C	YLR294C	1.06876	A
122C8	YLR296W	YLR296W	0.404389	A
122C9	YLR297W	YLR297W	0.207573	A
122D12	YLR319C	BUD6	0.231521	A
122D2	YLR306W	UBC12	0.956761	A
122D3	YLR307W	CDA1	0.664143	A
122D5	YLR309C	IMH1	0.334241	A
122D6	YLR311C	YLR311C	0.511869	A
122D7	YLR312C	YLR312C	0.590901	A
122D8	YLR312W-A	MRPL15	0.3522	NA
122D9	YLR313C	SPH1	0.303238	A
122E10	YGL203C	KEX1	-0.681818	A
122E11	YGL205W	POX1	0.561353	A
122E12	YGL199C	YGL199C	0.169034	A
122E3	YGL194C	HOS2	0.0711947	A
122E4	YGL195W	GCN1	-0.356844	A
122E5	YGL196W	YGL196W	0.787439	A
122E6	YGL197W	MDS3	0.318539	A
122E7	YGL198W	YGL198W	0.529918	A
122E8	YGL200C	EMP24	0.091263	A
122E9	YGL202W	ARO8	0.387769	A
122F1	YGL208W	SIP2	1.52427	A
122F10	YGL221C	NIF3	-0.742967	A
122F11	YGL222C	EDC1	0.187585	G
122F12	YGL224C	YGL224C	-0.208532	A
122F2	YGL209W	MIG2	0.694578	A
122F3	YGL210W	YPT32	0.150728	A
122F4	YGL211W	YGL211W	-1.90363	G
122F5	YGL212W	VAM7	-1.46912	B
122F6	YGL213C	SKI8	0.370179	A
122F7	YGL215W	CLG1	1.00749	A
122F8	YGL216W	KIP3	-0.0647974	A
122F9	YGL220W	YGL220W	0.112662	A
122G1	YGL226C-A	OST5	0.644544	A
122G10	YGL236C	MTO1	-0.145614	E
122G11	YGL237C	HAP2	-0.864484	A
122G12	YGL241W	KAP114	-0.50178	G
122G3	YGL227W	VID30	0.0138573	A
122G4	YGL228W	SHE10	0.131246	A
122G5	YGL229C	SAP4	0.815194	A
122G6	YGL230C	YGL230C	0.838684	A
122G7	YGL231C	YGL231C	0.447602	A
122G8	YGL232W	YGL232W	0.46225	A
122G9	YGL234W	ADE5	-0.806178	G
122H1	YGL243W	TAD1	0.912727	A
122H10	YGL253W	HXK2	-0.0903612	A
122H11	YGL254W	FZF1	-0.176631	A
122H12	YGL255W	ZRT1	-0.402157	A
122H5	YGL248W	PDE1	0.711448	A
122H6	YGL249W	ZIP2	0.252779	A
122H7	YGL250W	YGL250W	-1.39693	G
122H8	YGL251C	HFM1	0.434416	A
123A1	YGL256W	ADH4	-1.36829	A
123A10	YGR003W	YGR003W	-0.0972943	A
123A11	YGR004W	YGR004W	0.0293059	A
123A2	YGL257C	MNT2	-1.67043	A
123A3	YGL258W	YGL258W	-0.749823	A
123A4	YGL259W	YPS5	-0.810962	A
123A5	YGL260W	YGL260W	-0.153498	A
123A6	YGL261C	YGL261C	0.579763	A
123A7	YGL262W	YGL262W	0.426435	A
123A8	YGL263W	COS12	0.438825	A
123A9	YGR001C	YGR001C	-0.184372	A
123B12	YGR021W	YGR021W	0.872795	A
123B2	YGR008C	STF2	0.198351	A
123B3	YGR010W	YGR010W	0.360109	A
123B4	YGR012W	YGR012W	0.467415	A
123B5	YGR014W	MSB2	0.499622	A
123B6	YGR015C	YGR015C	0.31059	A
123B7	YGR016W	YGR016W	0.612759	A
123B8	YGR017W	YGR017W	0.294382	A
123B9	YGR019W	UGA1	1.14756	A
123C1	YGR023W	MTL1	0.0473893	A
123C10	YPL081W	RPS9A	0.179168	A
123C11	YPL080C	YPL080C	-1.9988	A
123C12	YPL079W	RPL21B	-1.5202	G
123C2	YGR026W	YGR026W	-0.868629	A
123C3	YPL091W	GLR1	-0.0170361	A
123C4	YPL090C	RPS6A	-2.88582	A
123C5	YPL089C	RLM1	-0.0729079	A
123C6	YPL088W	YPL088W	0.56531	A
123C7	YPL087W	YDC1	0.123647	A
123D1	YPL078C	ATP4	0.394684	A
123D10	YPL067C	YPL067C	0.714289	A
123D11	YPL066W	YPL066W	0.682527	A
123D12	YPL065W	VPS28	0.0648171	A
123D2	YPL077C	YPL077C	-1.33195	A
123D3	YPL074W	YTA6	0.104274	A
123D4	YPL072W	UBP16	0.791073	A
123D5	YPL073C	YPL073C	0.482875	A
123D6	YPL071C	YPL071C	0.737357	A
123D7	YPL070W	YPL070W	0.916117	A
123D8	YPL069C	BTS1	-0.929469	A
123D9	YPL068C	YPL068C	1.01036	A
123E1	YPL064C	YPL064C	0.26135	G
123E10	YPL054W	LEE1	0.632034	G
123E11	YPL053C	KTR6	0.452918	G
123E12	YPL052W	YPL052W	0.841049	A
123E2	YPL062W	YPL062W	0.278677	A
123E3	YPL061W	ALD6	1.07126	A
123E4	YPL060W	LPE10	-0.247327	K
123E6	YPL058C	PDR12	0.00598582	A
123E7	YPL057C	SUR1	1.52427	A
123E8	YPL056C	YPL056C	0.959791	A
123E9	YPL055C	YPL055C	-2.06155	G
123F1	YPL051W	ARL3	0.0830789	A
123F11	YPL039W	YPL039W	0.667374	A
123F12	YPL038W	MET31	0.697392	A
123F2	YPL050C	MNN9	-1.46679	A
123F3	YPL049C	DIG1	-1.96254	A
123F4	YPL048W	CAM1	0.535349	A
123F5	YPL047W	YPL047W	0.220257	A
123F6	YPL046C	ELC1	0.161377	A
123F8	YPL042C	SSN3	-2.8138	G
123F9	YPL041C	YPL041C	0.517419	A
123G1	YPL037C	EGD1	-0.568958	A
123G10	YPL024W	NCE4	-1.81421	A
123G11	YPL023C	MET12	-0.0447201	A
123G12	YPL022W	RAD1	1.28119	A
123G2	YPL035C	YPL035C	-2.24779	A
123G3	YPL033C	YPL033C	0.760143	A
123G4	YPL032C	SVL3	0.325519	A
123G8	YPL026C	SKS1	0.411165	A
123G9	YPL025C	YPL025C	0.377636	G
123H1	YPL021W	ECM23	-0.508614	NA
123H10	YPL008W	CHL1	-1.53607	A
123H12	YPL005W	YPL005W	-3.15434	A
123H2	YPL019C	VTC3	-0.215964	A
123H4	YPL018W	CTF19	-1.56934	A
123H5	YPL017C	YPL017C	-0.321763	H
123H6	YPL015C	HST2	0.648028	A
123H7	YPL014W	YPL014W	0.817787	A
123H9	YPL009C	YPL009C	0.594872	A
124A1	YPL003W	ULA1	0.515106	A
124A10	YPR109W	YPR109W	0.455026	A
124A11	YPR111W	DBF20	0.637296	A
124A12	YPR114W	YPR114W	0.498518	A
124A2	YPL002C	SNF8	-0.721324	A
124A3	YPL001W	HAT1	0.0972929	A
124A5	YPR002W	PDH1	0.531744	A
124A6	YPR003C	YPR003C	0.892921	A
124A7	YPR004C	YPR004C	0.976499	A
124A8	YPR005C	HAL1	0.934053	A
124A9	YPR106W	ISR1	0.245872	A
124B1	YPR115W	YPR115W	0.262118	A
124B10	YPR125W	YPR125W	0.832173	A
124B11	YPR126C	YPR126C	0.587362	A
124B3	YPR117W	YPR117W	-0.411292	A
124B4	YPR119W	CLB2	-0.837521	A
124B5	YPR120C	CLB5	-0.502871	A
124B6	YPR121W	THI22	0.417146	A
124B7	YPR122W	AXL1/STE22	1.29188	A
124C1	YPR127W	YPR127W	-0.0151378	A
124C11	YPR140W	YPR140W	0.116419	A
124C12	YPR141C	KAR3	-0.612836	A
124C2	YPR128C	YPR128C	-0.140506	A
124C3	YPR129W	SCD6	-0.288933	A
124C4	YPR130C	YPR130C	-0.784134	A
124C5	YPR131C	NAT3	-1.09119	D
124C6	YPR132W	RPS23B	-0.36825	G
124C7	YPR134W	MSS18	-0.557447	A
124C8	YPR135W	CTF4	-0.892406	C
124C9	YPR138C	MEP3	0.684011	A
124D1	YPR145W	ASN1	0.151447	A
124D10	YPR155C	NCA2	0.353462	A
124D11	YPR156C	YPR156C	1.08504	A
124D12	YPR157W	YPR157W	0.560468	A
124D2	YPR146C	YPR146C	-0.0399504	A
124D3	YPR147C	YPR147C	0.0452923	A
124D4	YPR148C	YPR148C	0.0775184	A
124D5	YPR149W	NCE102	0.573851	A
124D6	YPR150W	YPR150W	0.810725	A
124D7	YPR152C	YPR152C	0.292819	A
124D9	YPR154W	YPR154W	0.369975	A
124E1	YPR158W	YPR158W	-0.458379	A
124E10	YPR172W	YPR172W	0.620172	A
124E12	YPR174C	YPR174C	0.336914	A
124E2	YPR159W	KRE6	-2.66135	H
124E3	YPR160W	GPH1	-0.113888	A
124E4	YPR163C	TIF3	-4.21682	NA
124E5	YPR164W	KIM3	-0.949515	A
124E6	YPR166C	MRP2	0.734893	A
124E7	YPR167C	MET16	1.02617	A
124E8	YPR170C	YPR170C	0.482998	A
124E9	YPR171W	YPR171W	0.468592	A
124F1	YPR179C	PLO1	-0.0668176	A
124F10	YPR195C	YPR195C	0.546941	A
124F11	YPR196W	YPR196W	0.441461	A
124F12	YPR197C	YPR197C	0.0615003	G
124F2	YPR184W	GDB1	-0.0901746	A
124F3	YPR185W	APG13	0.133606	A
124F4	YPR188C	MLC2	-0.197908	A
124F5	YPR189W	SKI3	-0.227361	A
124F6	YPR191W	QCR2	-1.00313	A
124F7	YPR192W	AQY1	0.856822	A
124F8	YPR193C	HPA2	0.22471	A
124F9	YPR194C	OPT2	0.755699	A
124G1	YPR198W	SGE1	0.652992	G
124G10	YCR100C	YCR100C	0.386152	A
124G11	YCR101C	YCR101C	0.430366	A
124G12	YCR102C	YCR102C	0.670179	A
124G2	YPR199C	ARR1	0.00634787	G
124G3	YPR200C	ARR2	-0.256477	G
124G4	YPR201W	ARR3	0.322051	G
124G5	YCR090C	YCR090C	0.185242	G
124G6	YCR091W	KIN82	0.602232	A
124G7	YCR092C	MSH3	0.401547	A
124G8	YCR098C	GIT1	0.713754	A
124G9	YCR099C	YCR099C	0.308194	A
124H1	YCR105W	YCR105W	-0.168693	A
124H10	YDR539W	YDR539W	0.278322	A
124H11	YDR540C	YDR540C	0.0280556	A
124H12	YDR541C	YDR541C	0.203438	A
124H2	YCR106W	YCR106W	-0.328406	A
124H4	YDL130W-A	STF1	0.16828	A
124H5	YDR363W-A	SEM1	-0.670536	A
124H6	YDR525W-A	YDR525W-A	0.698007	A
124H7	YDR535C	YDR535C	1.52427	A
124H8	YDR536W	STL1	1.15921	A
124H9	YDR538W	PAD1	0.784135	A
125A1	YER039C-A	YER039C-A	0.0138573	A
125A10	YFR035C	YFR035C	0.28654	A
125A11	YFR036W	CDC26	0.421061	G
125A12	YFR038W	YFR038W	0.787439	G
125A2	YER091C-A	YER091C-A	0.370179	A
125A3	YER144C	UBP5	0.150728	A
125A4	YER188W	YER188W	-0.208532	A
125A5	YFL034C-A	RPL22B	0.303238	A
125A6	YFR032C	YFR032C	0.252779	A
125A7	YFR032C-A	RPL29	0.608162	A
125A8	YFR033C	QCR6	0.46225	A
125A9	YFR034C	PHO4	1.14544	A
125B1	YFR040W	SAP155	-0.864484	A
125B10	YFR053C	HXK1	0.091263	A
125B11	YFR054C	YFR054C	0.733645	A
125B12	YFR055W	YFR055W	0.86965	A
125B2	YFR041C	YFR041C	0.112662	A
125B3	YFR043C	YFR043C	0.404389	A
125B4	YFR044C	YFR044C	0.912727	A
125B5	YFR045W	YFR045W	0.269987	A
125B6	YFR046C	YFR046C	0.511869	A
125B7	YFR047C	YFR047C	0.664143	A
125B8	YFR048W	YFR048W	-0.681818	A
125B9	YFR049W	YMR31	0.956761	A
125C10	YGR225W	AMA1	0.493767	A
125C11	YGR226C	YGR226C	1.06876	A
125C12	YGR227W	DIE2	0.694578	A
125C2	YFR056C	YFR056C	0.334241	G
125C3	YFR057W	YFR057W	-0.145614	A
125C4	YGR219W	YGR219W	-0.621699	H
125C6	YGR221C	TOS2	0.561353	A
125C8	YGR223C	YGR223C	0.627679	A
125C9	YGR224W	AZR1	0.546643	A
125D1	YGR228W	YGR228W	-0.0098085	A
125D11	YGR240C	PFK1	-0.925835	NA
125D12	YGR241C	YAP1802	1.27926	A
125D2	YGR229C	SMI1	-1.0382	G
125D3	YGR230W	BNS1	0.036268	A
125D4	YGR231C	PHB2	0.131246	A
125D5	YGR232W	NAS6	-0.0351208	A
125D6	YGR233C	PHO81	-0.0647974	G
125D7	YGR234W	YHB1	0.644544	A
125D8	YGR235C	YGR235C	0.529918	A
125D9	YGR236C	SPG1	0.756379	A
125E1	YGR242W	YGR242W	0.169034	A
125E10	YBL006C	YBL006C	-1.13762	A
125E11	YBL007C	SLA1	-0.561001	A
125E12	YBL008W	HIR1	-0.272083	H
125E3	YGR244C	LSC2	-0.116216	A
125E4	YGR247W	YGR247W	0.187585	A
125E5	YGR249W	MGA1	0.207573	A
125E6	YBL001C	ECM15	0.318539	A
125E7	YBL002W	HTB2	0.47753	A
125E8	YBL003C	HTA2	0.231521	A
125E9	YBL005W	PDR3	0.575933	A
125F1	YBL009W	YBL009W	0.447602	A
125F10	YBL021C	HAP3	-0.50178	A
125F11	YBL022C	PIM1	-1.08485	A
125F12	YBL024W	NCL1	0.711448	A
[truncated: 2,051 more rows]

## Sheet: 2
Candidate Testing - Flow Cytometry
6 hours						24 hours
Accession	Common	% WT	StDev	Z Value		Accession	Common	% WT	StDev	Z Value
Wild Type	Wild Type	1	0.019	0		Wild Type	Wild Type	1	0.0173	0
BY4741	BY4741	0.19	0.0063	-2.12639		BY4741	BY4741	0.15	0.0047	-2.51784
YOL008W	YOL008W	0.153782	0.0122667	-2.22147		YDR216W	ADR1	0.100932	0.00730511	-2.66319
YDR216W	ADR1	0.245831	0.0283333	-1.97982		YOL008W	YOL008W	0.151235	0.000837954	-2.51419
YMR221C	YMR221C	0.295863	0.0236	-1.84848		YMR221C	YMR221C	0.170194	0.00251386	-2.45802
YMR180C	CTL1	0.327622	0.0261333	-1.76511		YLR093C	NYV1	0.171336	0.00365256	-2.45464
YMR238W	DFG5	0.331383	0.0264333	-1.75523		YMR180C	CTL1	0.17769	0.00509707	-2.43582
YDR148C	KGD2	0.368746	0.0425	-1.65715		YMR238W	DFG5	0.195988	0.00685895	-2.38162
YLR093C	NYV1	0.380745	0.0262333	-1.62565		YOR363C	PIP2	0.215388	0.0118208	-2.32415
YNL288W	CAF40	0.382783	0.0305333	-1.6203		YDR148C	KGD2	0.219524	0.0138453	-2.3119
YOR363C	PIP2	0.400752	0.0319667	-1.57313		YHR167W	THP2	0.230911	0.0139463	-2.27817
YNL339C	YRF1-6	0.44672	0.0356333	-1.45245		YNL288W	CAF40	0.25	0.010297	-2.22163
YNL265C	IST1	0.568742	0.0453667	-1.13212		YNL339C	YRF1-6	0.267637	0.00443404	-2.16938
YLR054C	YLR054C	0.598936	0.0412667	-1.05286		YOR003W	YSP3	0.32716	0.0159871	-1.99306
YHR167W	THP2	0.61487	0.0449333	-1.01103		YNL265C	IST1	0.342813	0.0109897	-1.9467
YLR104W	YLR104W	0.637155	0.0439	-0.952529		YOR008C	SLG1	0.370811	0.0283793	-1.86376
YDR025W	RPS11A	0.643156	0.0717333	-0.936776		YLR054C	YLR054C	0.467134	0.0112735	-1.57844
YMR125W	STO1	0.650628	0.0725667	-0.917161		YOR121C	YOR121C	0.46916	0.068952	-1.57244
YOR003W	YSP3	0.653573	0.0521333	-0.90943		YDL083C	RPS16B	0.475394	0.0398623	-1.55397
YMR100W	MUB1	0.666766	0.0743667	-0.874795		YLR104W	YLR104W	0.483297	0.0268799	-1.53056
YDR024W	FYV1	0.688583	0.0768	-0.817521		YJR060W	CBF1	0.516401	0.0326587	-1.4325
YDR215C	YDR215C	0.694688	0.0800667	-0.801495		YBR127C	VMA2	0.540198	0.012172	-1.36201
YOL086C	ADH1	0.758026	0.0873667	-0.635223		YBR200W	BEM1	0.541996	0.0298975	-1.35668
YBR267W	YBR267W	0.779991	0.057	-0.577561		YDR215C	YDR215C	0.543865	0.0312749	-1.35115
YBR289W	SNF5	0.788549	0.0673333	-0.555094		YOR303W	CPA1	0.546695	0.058997	-1.34277
YHR184W	SSP1	0.790482	0.0577667	-0.55002		YNL037C	IDH1	0.564185	0.00523302	-1.29096
YOR008C	SLG1	0.800251	0.0638333	-0.524376		YBR156C	SLI15	0.575605	0.034223	-1.25713
YHR199C	YHR199C	0.805534	0.0588667	-0.510505		YBR289W	SNF5	0.579341	0.0231463	-1.24606
YBR127C	VMA2	0.811191	0.0692667	-0.495656		YOR167C	RPS28A	0.584132	0.0439347	-1.23187
YOR167C	RPS28A	0.81153	0.0935333	-0.494766		YDR450W	RPS18A	0.584376	0.0569809	-1.23115
YBL039C	URA7	0.831196	0.0958	-0.443138		YBR267W	YBR267W	0.592719	0.0216737	-1.20643
YBR081C	SPT7	0.858035	0.0732667	-0.372682		YBR081C	SPT7	0.594445	0.00933106	-1.20132
YOL072W	THP1	0.863007	0.0745667	-0.359629		YGR018C	YGR018C	0.596594	0.0139966	-1.19496
YBL008W	HIR1	0.864167	0.0996	-0.356586		YNL133C	FYV6	0.597185	0.0159211	-1.19321
YDR418W	RPL12B	0.864376	0.0631667	-0.356036		YOL072W	THP1	0.603968	0.269384	-1.17311
YBR084C-A	RPL19A	0.872479	0.0745	-0.334765		YDR474C	YDR474C	0.60549	0.042165	-1.16861
YGR214W	RPS0A	0.874867	0.0639333	-0.328495		YGL148W	ARO2	0.608413	0.030178	-1.15995
YGR018C	YGR018C	0.876868	0.0978	-0.323243		YNL121C	TOM70	0.608413	0.0291844	-1.15995
YBR200W	BEM1	0.880341	0.0643333	-0.314126		YJR050W	ISY1	0.614454	0.010466	-1.14205
YIL111W	COX5B	0.887522	0.0969667	-0.295275		YDR447C	RPS17B	0.614747	0.0293284	-1.14118
YLR025W	SNF7	0.89163	0.0614333	-0.284489		YBR126C	TPS1	0.616859	0.0163562	-1.13493
YBR255W	YBR255W	0.898586	0.0656667	-0.266229		YOL093W	YOL093W	0.621219	0.0403264	-1.12201
YCR087W	YCR087W	0.905559	0.101	-0.247924		YOR035C	SHE4	0.621914	0.0388453	-1.11996
YJR050W	ISY1	0.909145	0.1014	-0.238509		YBR025C	YBR025C	0.62226	0.0204742	-1.11893
YBR194W	YBR194W	0.921393	0.0673333	-0.206357		YBR084C-A	RPL19A	0.622381	0.0261651	-1.11857
YKL047W	YKL047W	0.921849	0.0673667	-0.20516		YDL082W	RPL13A	0.626604	0.067957	-1.10606
YJR051W	OSM1	0.923192	0.102967	-0.201634		YGL105W	ARC1	0.627091	0.0400205	-1.10462
YDR136C	YDR136C	0.92641	0.0677	-0.193186		YLR371W	ROM2	0.629891	0.0388453	-1.09632
YBR175W	YBR175W	0.936445	0.0684333	-0.166842		YML041C	YML041C	0.630015	0.0293523	-1.09596
YDR116C	YDR116C	0.94055	0.0687333	-0.156065		YIR004W	DJP1	0.632776	0.0310382	-1.08778
YPL213W	LEA1	0.94055	0.0687333	-0.156065		YBR172C	SMY2	0.641221	0.0480126	-1.06276
YPL193W	RSA1	0.944199	0.069	-0.146486		YLR388W	RPS29A	0.643897	0.0159211	-1.05484
YNL037C	IDH1	0.949492	0.1059	-0.132592		YDR025W	RPS11A	0.647098	0.00799357	-1.04535
YEL063C	CAN1	0.972024	0.0710333	-0.0734425		YBR026C	MRF1'	0.649346	0.0203366	-1.0387
YOR124C	UBP2	0.976585	0.0713667	-0.0614681		YIL135C	YIL135C	0.665584	0.0384638	-0.990597
YOR121C	YOR121C	0.977827	0.1127	-0.0582077		YML036W	YML036W	0.665746	0.038655	-0.990115
YKL143W	LTV1	0.984339	0.0719333	-0.0411118		YJL188C	BUD19	0.670846	0.032204	-0.975008
YGR130C	YGR130C	0.988901	0.0722667	-0.0291375		YJL177W	RPL17B	0.671593	0.0545057	-0.972796
YBR126C	TPS1	0.993103	0.0848	-0.0181046		YOR129C	YOR129C	0.672612	0.0572207	-0.969777
YLR435W	YLR435W	0.997051	0.108933	-0.00774229		YJL160C	YJL160C	0.674192	0.0168218	-0.965098
YDR146C	SWI5	1.00167	0.0732	0.00439058		YJR061W	YJR061W	0.676313	0.0294001	-0.958815
YIL102C	YIL102C	1.00834	0.110167	0.021892		YIL155C	GUT2	0.679389	0.0371262	-0.949703
YLR048W	RPS0B	1.01209	0.0697333	0.031751		YOR285W	YOR285W	0.684004	0.0568513	-0.936034
YEL061C	CIN8	1.02129	0.0746333	0.0558801		YML022W	APT1	0.687185	0.0762676	-0.926609
YGR135W	PRE9	1.03315	0.0755	0.0870133		YJR051W	OSM1	0.689205	0.0194903	-0.920626
YLR371W	ROM2	1.03397	0.112967	0.0891698		YGL023C	PIB2	0.692044	0.0631141	-0.912218
YOL093W	YOL093W	1.03422	0.1192	0.0898424		YDL081C	RPP1A	0.692058	0.0868769	-0.912176
YPL261C	YPL261C	1.03634	0.0757333	0.0953954		YMR125W	STO1	0.693227	0.0156543	-0.908714
YNL138W	SRV2	1.03915	0.113533	0.102786		YMR097C	YMR097C	0.697012	0.0565169	-0.897503
YOR035C	SHE4	1.04012	0.0829667	0.105314		YCR087W	YCR087W	0.697958	0.0230399	-0.8947
YOL058W	ARG1	1.04346	0.0832333	0.11409		YDR024W	FYV1	0.701151	0.0109577	-0.88524
YJL188C	BUD19	1.04348	0.120267	0.114138		YPR065W	ROX1	0.714635	0.0359735	-0.845299
YHL044W	YHL044W	1.04637	0.0764667	0.121739		YLL009C	COX17	0.71927	0.0336436	-0.831569
YDL083C	RPS16B	1.04971	0.0896333	0.13049		YOL058W	ARG1	0.719797	0.0337374	-0.830008
YKL097C	YKL097C	1.05367	0.077	0.140898		YJR079W	YJR079W	0.722914	0.0225003	-0.820774
YNL242W	APG2	1.0541	0.115167	0.142031		YMR151W	YIM2	0.73088	0.0408024	-0.797178
YIL084C	SDS3	1.06314	0.122533	0.165765		YJL140W	RPB4	0.732662	0.0291362	-0.7919
YNL213C	YNL213C	1.06448	0.1163	0.169262		YJR062C	NTA1	0.732731	0.021149	-0.791694
YBR025C	YBR025C	1.06695	0.119	0.175744		YDR418W	RPL12B	0.733842	0.0261383	-0.788403
YJR060W	CBF1	1.07711	0.120133	0.202419		YIL163C	YIL163C	0.736398	0.0271657	-0.780834
YML094W	GIM5	1.08667	0.1212	0.227525		YMR100W	MUB1	0.738527	0.00944326	-0.774527
YIL154C	IMP2'	1.09255	0.119367	0.242948		YNL213C	YNL213C	0.739726	0.0264055	-0.770975
YJR082C	YJR082C	1.09594	0.122233	0.251847		YIL161W	YIL161W	0.742082	0.038189	-0.763996
YJR078W	YJR078W	1.10699	0.123467	0.280876		YIL111W	COX5B	0.746545	0.134096	-0.750777
YHR064C	PDR13	1.10797	0.1277	0.283446		YEL063C	CAN1	0.747137	0.0281931	-0.749024
YBR026C	MRF1'	1.11148	0.123967	0.292644		YJR102C	VPS25	0.748462	0.0437906	-0.745097
YLL055W	YLL055W	1.11224	0.0766333	0.294649		YJL175W	YJL175W	0.754263	0.0599181	-0.727913
YJR088C	YJR088C	1.11686	0.124567	0.306767		YDR146C	SWI5	0.756136	0.0341306	-0.722367
YPL178W	CBC2	1.12072	0.0819	0.31692		YBR194W	YBR194W	0.759613	0.0269712	-0.712067
YJR062C	NTA1	1.12821	0.125833	0.33658		YER090W	TRP2	0.763301	0.0642061	-0.701143
YOR285W	YOR285W	1.12937	0.130167	0.339629		YNR008W	LRO1	0.768097	0.0258139	-0.686937
YLL009C	COX17	1.13282	0.123767	0.34867		YJR082C	YJR082C	0.782526	0.0106983	-0.644193
YJR079W	YJR079W	1.13539	0.126633	0.35541		YBR255W	YBR255W	0.785383	0.038189	-0.635731
YPR065W	ROX1	1.14196	0.127367	0.37267		YJR088C	YJR088C	0.788913	0.0198119	-0.625274
YLR017W	MEU1	1.14417	0.0788333	0.378471		YMR035W	IMP2	0.790589	0.0447423	-0.62031
YGR219W	YGR219W	1.14586	0.132067	0.382906		YJR078W	YJR078W	0.791042	0.0174367	-0.618967
YLR388W	RPS29A	1.15112	0.125767	0.396725		YLR024C	UBR2	0.792385	0.0336123	-0.61499
YJL115W	ASF1	1.15481	0.1288	0.406407		YDL117W	CYK3	0.796365	0.0171115	-0.603201
YMR097C	YMR097C	1.15989	0.129367	0.419745		YIL102C	YIL102C	0.803305	0.0183778	-0.582644
YOR129C	YOR129C	1.16292	0.134033	0.4277		YIL084C	SDS3	0.804451	0.0198119	-0.57925
YLR114C	EFR4	1.17707	0.0811	0.464834		YJL115W	ASF1	0.808193	0.00632641	-0.568165
YMR035W	IMP2	1.18468	0.129433	0.484827		YMR256C	COX7	0.808281	0.0388453	-0.567905
YLR107W	REX3	1.18481	0.0816333	0.485155		YGR219W	YGR219W	0.811338	0.0624149	-0.558848
YLR234W	TOP3	1.1859	0.129567	0.488031		YHR064C	PDR13	0.812133	0.0191999	-0.556494
YJR061W	YJR061W	1.18948	0.132667	0.497417		YLR114C	EFR4	0.817349	0.0400906	-0.541042
YLL029W	YLL029W	1.19207	0.0821333	0.504205		YJL209W	CBP1	0.838135	0.00951733	-0.479471
YPL239W	YAR1	1.19234	0.0871333	0.504917		YLR435W	YLR435W	0.840162	0.0171934	-0.473466
YPL118W	MRP51	1.19507	0.0873333	0.512101		YCR094W	CDC50	0.853799	0.0326802	-0.433071
YJL160C	YJL160C	1.21132	0.103433	0.554753		YNL242W	APG2	0.863567	0.0306627	-0.404139
YLL012W	YLL012W	1.21916	0.084	0.575327		YLR244C	MAP1	0.863751	0.0192729	-0.403593
YNL230C	ELA1	1.22343	0.133667	0.586545		YLR234W	TOP3	0.872597	0.03411	-0.37739
YLL013C	YLL013C	1.22351	0.0843	0.586758		YPL213W	LEA1	0.874761	0.032204	-0.370978
YPL017C	YPL017C	1.24246	0.1432	0.636489		YOL086C	ADH1	0.880657	0.0170086	-0.353514
YLR024C	UBR2	1.25302	0.0863333	0.66423		YOR013W	YOR013W	0.88448	0.0473944	-0.34219
YLR235C	YLR235C	1.25608	0.137233	0.672244		YDR136C	YDR136C	0.887033	0.028552	-0.334627
YML020W	YML020W	1.25931	0.0867667	0.68074		YBR023C	CHS3	0.888267	0.0318422	-0.330972
YJL175W	YJL175W	1.25934	0.107533	0.680802		YKL143W	LTV1	0.891942	0.0644571	-0.320087
YNL133C	FYV6	1.2627	0.140833	0.689636		YNL239W	LAP3	0.891947	0.0247587	-0.320072
YLR044C	PDC1	1.26851	0.0874	0.704871		YLR348C	DIC1	0.895817	0.0138453	-0.308608
YGL148W	ARO2	1.26871	0.108333	0.705397		YHR199C	YHR199C	0.902168	0.0564423	-0.289795
YDR319C	YDR319C	1.27687	0.147167	0.726837		YOR170W	YOR170W	0.904852	0.167723	-0.281843
YBR156C	SLI15	1.28471	0.1097	0.747413		YLR048W	RPS0B	0.920797	0.0187185	-0.234611
YLR348C	DIC1	1.29879	0.1419	0.784374		YNL231C	PDR16	0.923644	0.0124006	-0.226179
YML041C	YML041C	1.29993	0.111	0.78738		YLR058C	SHM2	0.928161	0.0348432	-0.212799
YPR159W	KRE6	1.30464	0.150367	0.799724		YKL169C	YKL169C	0.929173	0.0395173	-0.209803
YNL197C	WHI3	1.30637	0.150567	0.804279		YHL044W	YHL044W	0.929779	0.030525	-0.208006
YNL227C	YNL227C	1.30642	0.142733	0.804397		YPR159W	KRE6	0.936907	0.120187	-0.186893
REM50	REM50	1.30818	0.0901333	0.809014		YPL261C	YPL261C	0.945732	0.0318422	-0.16075
YMR245W	YMR245W	1.31592	0.104967	0.829347		YNL230C	ELA1	0.954051	0.0168218	-0.136108
YGL105W	ARC1	1.32141	0.112833	0.843743		YBR175W	YBR175W	0.957186	0.0266174	-0.126823
YOR303W	CPA1	1.32531	0.113167	0.853991		YDR319C	YDR319C	0.959954	0.0406472	-0.118623
YLR046C	YLR046C	1.33962	0.0923	0.891567		YPR095C	SYT1	0.967513	0.0193275	-0.0962319
YNL239W	LAP3	1.33998	0.1464	0.892499		YPL017C	YPL017C	0.980882	0.0754298	-0.0566302
YNL231C	PDR16	1.34089	0.1465	0.894901		YEL061C	CIN8	0.989092	0.0148958	-0.0323116
YDR129C	SAC6	1.34104	0.098	0.89528		YML020W	YML020W	0.991918	0.0183778	-0.0239399
YPR095C	SYT1	1.34818	0.150367	0.914023		YMR245W	YMR245W	0.99537	0.0234627	-0.0137137
YNL121C	TOM70	1.3499	0.115267	0.918553		YLR107W	REX3	0.99569	0.040957	-0.012768
YLR326W	YLR326W	1.36103	0.156867	0.947774		YGR214W	RPS0A	0.996864	0.0301081	-0.00928959
YMR151W	YIM2	1.36408	0.149033	0.955772		YGR135W	PRE9	1.00075	0.0334762	0.00222142
YMR310C	YMR310C	1.37108	0.109367	0.974154		YGL026C	TRP5	1.00676	0.0386823	0.0200102
YLL056C	YLL056C	1.37349	0.0946333	0.980469		YDR377W	ATP17	1.01155	0.0577702	0.0342089
YLL057C	YLL057C	1.37687	0.0948667	0.98936		YPL239W	YAR1	1.01936	0.0550058	0.0573531
YMR256C	COX7	1.37689	0.150433	0.989411		YLR046C	YLR046C	1.02748	0.027114	0.0813958
YOL012C	HTZ1	1.38069	0.110133	0.999385		YHR184W	SSP1	1.02857	0.0370694	0.084616
YFL021W	GAT1	1.38272	0.159367	1.00472		YMR310C	YMR310C	1.03461	0.0378844	0.102527
YJL209W	CBP1	1.38391	0.1512	1.00783		YNL138W	SRV2	1.03735	0.201743	0.110633
YLR082C	SRL2	1.3851	0.0954333	1.01095		YKL047W	YKL047W	1.04166	0.0604257	0.12339
YBR023C	CHS3	1.3957	0.155667	1.03877		YLR235C	YLR235C	1.04398	0.0286379	0.130285
YPR132W	RPS23B	1.40037	0.1614	1.05103		YLL029W	YLL029W	1.04903	0.0189422	0.145236
YJL177W	RPL17B	1.40846	0.120267	1.07227		YLL055W	YLL055W	1.05783	0.0249845	0.171304
YDR447C	RPS17B	1.42563	0.121733	1.11736		YOL012C	HTZ1	1.07385	0.0522765	0.218767
YJR102C	VPS25	1.43246	0.159767	1.13527		YLR082C	SRL2	1.07597	0.0378844	0.225035
YLL060C	GTT2	1.43251	0.0987	1.13541		YPR132W	RPS23B	1.08641	0.0643044	0.255948
YIL155C	GUT2	1.43422	0.122467	1.13991		YNL197C	WHI3	1.12005	0.0582785	0.355607
YML022W	APT1	1.44554	0.123433	1.16963		YDR116C	YDR116C	1.12981	0.0275889	0.384508
YKL169C	YKL169C	1.46141	0.159667	1.21127		YPR135W	CTF4	1.13206	0.0971051	0.39118
YAL027W	YAL027W	1.47574	0.161233	1.24891		YLR025W	SNF7	1.13829	0.0302129	0.409639
YIL135C	YIL135C	1.49278	0.127467	1.29363		YIL154C	IMP2'	1.13926	0.0319743	0.412509
YDL082W	RPL13A	1.50644	0.128633	1.32949		KRE28	KRE28	1.14368	0.00725689	0.42561
YOR252W	YOR252W	1.5068	0.173667	1.33043		YLL056C	YLL056C	1.14871	0.0087485	0.440495
YBR172C	SMY2	1.52088	0.129867	1.36741		YOR252W	YOR252W	1.15025	0.0696863	0.445064
YPR135W	CTF4	1.52299	0.175533	1.37294		YBL008W	HIR1	1.17171	0.081781	0.508626
YIR004W	DJP1	1.54275	0.131733	1.4248		YBL039C	URA7	1.17771	0.0353136	0.526413
YLR055C	SPT8	1.54427	0.1064	1.42879		YFL021W	GAT1	1.19096	0.043063	0.565649
YIL161W	YIL161W	1.56851	0.133933	1.49243		YNL227C	YNL227C	1.19326	0.0589434	0.572454
YDR474C	YDR474C	1.57163	0.1342	1.50063		YLL057C	YLL057C	1.19432	0.0140966	0.575622
YNL219C	ALG9	1.5929	0.174033	1.55647		YOR124C	UBP2	1.19444	0.0751687	0.575955
YNR008W	LRO1	1.59653	0.178067	1.566		YKL097C	YKL097C	1.22184	0.0760971	0.657138
YDR450W	RPS18A	1.6052	0.137067	1.58877		YLL012W	YLL012W	1.22234	0.024416	0.658614
YLR244C	MAP1	1.61212	0.176133	1.60692		YNL219C	ALG9	1.23583	0.04129	0.698554
YCR094W	CDC50	1.61548	0.1765	1.61573		YLL013C	YLL013C	1.23599	0.0377079	0.699046
YOR013W	YOR013W	1.63017	0.130033	1.65431		YLL060C	GTT2	1.23743	0.0125693	0.703302
YER090W	TRP2	1.66239	0.1916	1.73889		YLR044C	PDC1	1.24156	0.0101597	0.715538
YJL183W	MNN11	1.665	0.1919	1.74573		YLR017W	MEU1	1.29885	0.0112735	0.885245
YGL023C	PIB2	1.66946	0.1862	1.75744		YLR326W	YLR326W	1.31538	0.0311399	0.934203
YGL026C	TRP5	1.67772	0.193367	1.77913		YDR129C	SAC6	1.31674	0.0411537	0.938249
YDL081C	RPP1A	1.69811	0.145	1.83266		YPL193W	RSA1	1.40244	0.017597	1.1921
YDR377W	ATP17	1.72318	0.188267	1.89846		YJL183W	MNN11	1.40333	0.0829701	1.19473
YMR142C	RPL13B	1.75105	0.1953	1.97162		YGR130C	YGR130C	1.41717	0.018492	1.23572
YIL163C	YIL163C	1.75472	0.149833	1.98126		YLR055C	SPT8	1.42852	0.0624599	1.26935
YJL140W	RPB4	1.76721	0.1509	2.01405		YPL178W	CBC2	1.53968	0.0535045	1.59862
KRE28	KRE28	1.77108	0.1935	2.02421		YAL027W	YAL027W	1.55298	0.0234627	1.63803
YLR058C	SHM2	1.776	0.122367	2.03714		YDR195W	REF2	1.58621	0.110012	1.73644
YML036W	YML036W	1.79453	0.153233	2.08579		YMR142C	RPL13B	1.64868	0.0356697	1.92148
YOR170W	YOR170W	1.84344	0.212467	2.21417		REM50	REM50	1.64871	0.021149	1.92158
YDL117W	CYK3	1.86671	0.2082	2.27525		YML094W	GIM5	1.90285	0.0328089	2.67441
YLL001W	DNM1	2.49686	0.172033	3.9295		YLL001W	DNM1	1.99443	0.070423	2.94568
YDR195W	REF2	2.76285	0.318433	4.62777		YPL118W	MRP51	2.17412	0.0261383	3.47794

## Sheet: 3
Deletion Strains Not Studied
Library Position	Gene	Common Name	Strain	Error Type			NA: Not Available	256
101A10	YAL058W	CNE1	BY4739	MT error			MT error: incorrect mating type	457
101A11	YAL056W	YAL056W	BY4739	MT error			PCR fail: POT1 GFP integration failure or designated gene deletion not present.	13
101A12	YAL055W	PEX22	BY4739	MT error
101A2	YAL068C	YAL068C	BY4739	MT error
101A3	YAL067C	SEO1	BY4739	MT error
101A4	YAL066W	YAL066W	BY4739	MT error
101A5	YAL065C	YAL065C	BY4739	MT error
101A6	YAL062W	GDH3	BY4739	MT error
101A7	YAL061W	YAL061W	BY4739	MT error
101A8	YAL060W	YAL060W	BY4739	MT error
101A9	YAL059W	ECM1	BY4739	MT error
101B1	YAL053W	YAL053W	BY4739	MT error
101B10	YAL040C	CLN3	BY4739	MT error
101B11	YAL037W	YAL037W	BY4739	MT error
101B12	YAL036C	FUN11	BY4739	MT error
101B2	YAL051W	OAF1	BY4739	MT error
101B3	YAL049C	YAL049C	BY4739	MT error
101B4	YAL048C	YAL048C	BY4739	MT error
101B5	YAL046C	YAL046C	BY4739	MT error
101B6	YAL045C	YAL045C	BY4739	MT error
101B7	YAL044C	GCV3	BY4739	MT error
101B8	YAL042W	ERV46	BY4739	MT error
101B9	YAL043C-a	KRE23	BY4739	MT error
101C1	YAL035W	FUN12	BY4739	MT error
101C10	YAL021C	CCR4	BY4739	MT error
101C11	YAL020C	ATS1	BY4739	MT error
101C12	YAL019W	FUN30	BY4739	MT error
101C2	YAL034C	FUN19	BY4739	MT error
101C3	YAL031C	FUN21	BY4739	MT error
101C4	YAL030W	SNC1	BY4739	MT error
101C5	YAL029C	MYO4	BY4739	MT error
101C6	YAL028W	YAL028W	BY4739	MT error
101C7	YAL026C	DRS2	BY4739	MT error
101C8	YAL023C	PMT2	BY4739	MT error
101C9	YAL022C	FUN26	BY4739	MT error
101D1	YAL018C	YAL018C	BY4739	MT error
101D10	YAL007C	ERP2	BY4739	MT error
101D11	YAL004W	YAL004W	BY4739	MT error
101D12	YAL005C	SSA1	BY4739	MT error
101D2	YAL017W	FUN31	BY4739	MT error
101D3	YAL015C	NTG1	BY4739	MT error
101D4	YAL014C	YAL014C	BY4739	MT error
101D5	YAL013W	DEP1	BY4739	MT error
101D6	YAL011W	YAL011W	BY4739	MT error
101D7	YAL010C	MDM10	BY4739	MT error
101D8	YAL009W	SPO7	BY4739	MT error
101D9	YAL008W	FUN14	BY4739	MT error
101E1	YAL002W	VPS8	BY4739	MT error
101E10	YAR028W	YAR028W	BY4739	MT error
101E11	YAR029W	YAR029W	BY4739	MT error
101E12	YAR031W	PRM9	BY4739	MT error
101E2	YAR002W	NUP60	BY4739	MT error
101E3	YAR003W	YAR003W	BY4739	MT error
101E4	YAR014C	BUD14	BY4739	MT error
101E5	YAR015W	ADE1	BY4739	MT error
101E6	YAR018C	KIN3	BY4739	MT error
101E7	YAR020C	PAU7	BY4739	MT error
101E8	YAR023C	YAR023C	BY4739	MT error
101E9	YAR027W	YAR027W	BY4739	MT error
101F1	YAR030C	YAR030C	BY4739	MT error
101F2	YAR035W	YAT1	BY4739	MT error
101F3	YAR037W	YAR037W	BY4739	MT error
101F4	YAR040C	YAR040C	BY4739	MT error
101F5	YAR042W	SWH1	BY4739	MT error
101F6	YAR043C-a	YAR043C-a	BY4739	MT error
101F7	YAR044W	OSH1	BY4739	MT error
101F8	YAR047C	YAR047C	BY4739	MT error
101H12	YLL046C	RNP1	BY4742	NA
102D11	YLR061W	RPL22A	BY4742	NA
102D7	YLR056W	ERG3	BY4742	MT error
102E4	YLR068W	FYV7	BY4742	MT error
102E5	YLR072W	YLR072W	BY4742	MT error
102E7	YLR074C	BUD20	BY4742	MT error
102F4	YLR087C	CSF1	BY4742	MT error
102G1	YLR098C	CHA4	BY4743	PCR fail
102G2	YLR099C	ICT1	BY4742	NA
102H12	YML084W	YML084W	BY4739	MT error
103A1	YML083C	YML083C	BY4739	MT error
103A2	YML082W	YML082W	BY4739	MT error
103A4	YML081W	YML081W	BY4739	MT error
103A5	YML080W	DUS1	BY4739	MT error
103A6	YML079W	YML079W	BY4739	MT error
103A7	YML078W	CPR3	BY4739	MT error
103C4	YML032C	RAD52	BY4742	MT error
103C8	YML026C	RPS18B	BY4742	MT error
103C9	YML024W	RPS17A	BY4742	MT error
103F2	YMR014W	BUD22	BY4742	MT error
103G11	YMR041C	YMR041C	BY4742	NA
103H5	YMR143W	RPS16A	BY4742	MT error
104B10	YMR179W	SPT21	BY4742	MT error
104C8	YMR190C	SGS1	BY4744	PCR fail
104D2	YMR198W	CIK1	BY4742	MT error
104D5	YMR202W	ERG2	BY4742	MT error
104D7	YMR205C	PFK2	BY4742	MT error
104D9	YMR207C	HFA1	BY4745	PCR fail
104E6	YMR224C	MRE11	BY4742	MT error
104E9	YMR230W	RPS10B	BY4742	PCR fail
104G8	YMR261C	TPS3	BY4742	NA
104H1	YMR269W	YMR269W	BY4742	MT error
105A11	YMR302C	PRP12	BY4743	PCR fail
105A2	YMR291W	YMR291W	BY4742	MT error
105A4	YMR294W	JNM1	BY4742	PCR fail
105A6	YMR294W-A	YMR294W-A	BY4742	MT error
105A8	YMR297W	PRC1	BY4742	MT error
105B1	YMR304W	UBP15	BY4742	MT error
105B2	YMR304C-A	YMR304C-A	BY4742	MT error
105B3	YMR305C	SCW10	BY4742	MT error
105B5	YMR307W	GAS1	BY4742	NA
105C10	YNL321W	YNL321W	BY4742	MT error
105C2	YNL329C	PEX6	BY4742	MT error
105C8	YNL323W	LEM3	BY4742	PCR fail
105D1	YNL318C	HXT14	BY4742	MT error
105D3	YNL311C	YNL311C	BY4742	MT error
105D7	YNL303W	YNL303W	BY4742	PCR fail
105E1	YNL297C	MON2	BY4742	PCR fail
105E2	YNL295W	YNL295W	BY4742	MT error
105E3	YNL294C	YNL294C	BY4742	MT error
105E4	YNL293W	MSB3	BY4742	MT error
105E9	YNL286W	CUS2	BY4742	MT error
105F1	YNL280C	ERG24	BY4742	NA
105F2	YNL278W	CAF120	BY4742	MT error
105F3	YNL275W	YNL275W	BY4742	MT error
105F4	YNL273W	TOF1	BY4742	MT error
105F5	YNL271C	BNI1	BY4742	MT error
105F6	YNL270C	ALP1	BY4742	MT error
105F7	YNL269W	YNL269W	BY4742	MT error
105G1	YNL255C	GIS2	BY4742	MT error
105G2	YNL254C	YNL254C	BY4742	MT error
105G4	YNL249C	MPA43	BY4742	MT error
105G5	YNL248C	RPA49	BY4742	PCR fail
105G6	YNL246W	YNL246W	BY4742	PCR fail
105G7	YOR001W	RRP6	BY4742	PCR fail
105H4	YOR010C	TIR2	BY4742	PCR fail
105H8	YOR014W	RTS1	BY4742	MT error
106B6	YOR036W	PEP12	BY4742	NA
106B9	YOR039W	CKB2	BY4742	MT error
106C11	YOR055W	YOR055W	BY4742	NA
106E4	YOR080W	DIA2	BY4742	MT error
106F11	YOR293W	RPS10A	BY4742	MT error
106F12	YOR295W	YOR295W	BY4742	MT error
106F8	YER070W	RNR1	BY4742	NA
106H10	YOR323C	PRO2	BY4742	MT error
107B12	YOR360C	PDE2	BY4742	NA
107D5	YOL001W	PHO80	BY4742	NA
107D8	YOL004W	SIN3	BY4742	MT error
107F10	YOL041C	NOP12	BY4742	MT error
107G5	YOL048C	YOL048C	BY4742	MT error
107H1	YOL055C	THI20	BY4742	NA
108A11	YOL081W	IRA2	BY4742	NA
108B12	YPL262W	FUM1	BY4742	NA
108C7	YPL254W	HFI1	BY4742	NA
108D2	YPL245W	YPL245W	BY4742	NA
108G6	YPL188W	POS5	BY4742	NA
108G9	YPL186C	YPL186C	BY4742	NA
109C4	YPL125W	KAP120	BY4742	MT error
109C8	YPL119C	DBP1	BY4742	NA
109D12	YPL102C	KRE24	BY4742	MT error
109E4	YPL097W	MSY1	BY4742	NA
109G10	YBR208C	DUR1	BY4742	NA
109H1	YBR212W	NGR1	BY4742	NA
110E5	YDR079W	PET100	BY4742	NA
111A6	YDR140W	FYV9	BY4742	MT error
111B1	YDR340W	YDR340W	BY4742	NA
111B12	YDR359C	VID21	BY4742	MT error
111B9	YDR354W	TRP4	BY4742	MT error
111C10	YDR378C	LSM6	BY4742	MT error
111C2	YDR363W	ESC2	BY4742	MT error
111C3	YDR364C	CDC40	BY4742	MT error
111C5	YDR369C	XRS2	BY4742	MT error
111C6	YDR370C	YDR370C	BY4742	NA
111D1	YDR382W	RPP2B	BY4742	MT error
111D10	YDR392W	SPT3	BY4742	MT error
111D11	YDR393W	SHE9	BY4742	MT error
111E10	YDR410C	STE14	BY4742	MT error
111E6	YDR405W	MRP20	BY4742	NA
111G1	YDR432W	NPL3	BY4742	MT error
111G10	YEL008W	YEL008W	BY4742	NA
111G11	YEL009C	GCN4	BY4742	MT error
111H1	YEL013W	VAC8	BY4742	MT error
111H11	YEL024W	RIP1	BY4742	NA
111H8	YEL018W	YEL018W	BY4742	NA
112B9	YEL050C	RML2	BY4742	NA
112D3	YEL072W	YEL072W	BY4742	NA
112E9	YER040W	GLN3	BY4742	MT error
112H5	YER083C	YER083C	BY4742	MT error
113B2	YGR139W	YGR139W	BY4742	NA
113B3	YGR141W	YGR141W	BY4742	NA
113C3	YGR159C	NSR1	BY4742	MT error
113C4	YGR160W	FYV13	BY4742	MT error
113C6	YGR163W	GTR2	BY4742	MT error
113C8	YGR165W	YGR165W	BY4742	NA
113D2	YGR176W	YGR176W	BY4742	NA
113D7	YGR183C	QCR9	BY4742	NA
114A2	YHR015W	MIP6	BY4742	NA
114B3	YHR038W	FIL1	BY4742	NA
114C2	YHR060W	VMA22	BY4742	MT error
114H12	YHR183W	GND1	BY4742	MT error
115B7	YCL007C	CWH36	BY4742	MT error
115B8	YCL008C	STP22	BY4742	NA
115B9	YCL009C	ILV6	BY4742	NA
116A11	YLR178C	TFS1	BY4742	MT error
116A12	YLR179C	YLR179C	BY4742	MT error
116B1	YLR180W	SAM1	BY4742	NA
116B2	YLR181C	YLR181C	BY4742	NA
116B3	YLR182W	SWI6	BY4742	NA
116B9	YLR188W	MDL1	BY4742	NA
116C4	YLR200W	YKE2	BY4742	NA
116C5	YLR204W	QRI5	BY4742	NA
116D10	YLR226W	BUR2	BY4742	NA
116G7	YKL054C	VID31	BY4742	NA
117A11	YKL091C	YKL091C	BY4742	MT error
117A12	YKL092C	BUD2	BY4742	MT error
117A6	YKL081W	TEF4	BY4742	NA
117B1	YKL093W	MBR1	BY4742	NA
117E8	YKL155C	RSM22	BY4742	NA
117H1	YGR036C	CAX4	BY4742	NA
117H12	YGR052W	YGR052W	BY4742	NA
117H7	YGR043C	YGR043C	BY4742	NA
118A1	YGR054W	YGR054W	BY4742	NA
118A2	YGR055W	MUP1	BY4742	NA
118A3	YGR056W	RSC1	BY4742	NA
118A4	YGR057C	LST7	BY4742	NA
118A5	YGR058W	YGR058W	BY4742	NA
118B5	YGR078C	PAC10	BY4742	NA
118C5	YGR101W	YGR101W	BY4742	NA
118C6	YGR104C	SRB5	BY4742	NA
118C7	YGR105W	VMA21	BY4742	MT error
118C8	YGR107W	YGR107W	BY4742	NA
118C9	YGR108W	CLB1	BY4742	NA
118F12	YOR140W	SFL1	BY4742	NA
118F2	YOR130C	ORT1	BY4742	MT error
118F7	YOR135C	YOR135C	BY4742	NA
118H7	YOR175C	YOR175C	BY4742	NA
119A1	YOR183W	FYV12	BY4742	MT error
119B10	YOR209C	NPT1	BY4742	MT error
119B3	YOR199W	YOR199W	BY4742	NA
119B4	YOR200W	YOR200W	BY4742	NA
119B8	YOR205C	YOR205C	BY4742	NA
119C5	YOR221C	MCT1	BY4742	MT error
119E12	YOR279C	YOR279C	BY4742	NA
119H7	YJL179W	PFD1	BY4742	MT error
119H9	YJL176C	SWI3	BY4742	NA
120C3	YJL129C	TRK1	BY4742	MT error
120D9	YLR393W	ATP10	BY4742	NA
120E5	YLR403W	SFP1	BY4742	MT error
120G7	YDR159W	SAC3	BY4742	MT error
120H2	YDR176W	NGG1	BY4742	MT error
121C2	YDR226W	ADK1	BY4742	MT error
121C7	YDR237W	MRPL7	BY4742	NA
121C9	YDR241W	BUD26	BY4742	MT error
121D4	YDR103W	STE5	BY4742	NA
121D7	YEL029C	BUD16	BY4742	NA
121D9	YER039C	HVG1	BY4742	NA
121E1	YER061C	CEM1	BY4742	NA
121F11	YOR212W	STE4	BY4742	NA
121F12	YJL206C-A	#N/A	BY4742	NA
121F4	YHR177W	YHR177W	BY4742	NA
121F8	YKL135C	APL2	BY4742	NA
121F9	YKL177W	YKL177W	BY4742	NA
121G1	YJL204C	YJL204C	BY4742	NA
121G10	YLR231C	YLR231C	BY4742	NA
121G11	YLR232W	YLR232W	BY4742	NA
121G12	YLR236C	YLR236C	BY4742	NA
121G2	YJL201W	ECM25	BY4742	NA
121G4	YJL138C	TIF2	BY4742	NA
121G5	YJL130C	URA2	BY4742	NA
121G6	YDR173C	ARG82	BY4742	NA
121G7	YDR227W	SIR4	BY4742	NA
121G8	YCL030C	HIS4	BY4742	NA
121G9	YLR228 C	#N/A	BY4742	NA
121H1	YLR238W	YLR238W	BY4742	NA
121H10	YLR254C	YLR254C	BY4742	NA
121H11	YLR255C	YLR255C	BY4742	NA
121H12	YLR257W	YLR257W	BY4742	NA
121H2	YLR241W	YLR241W	BY4742	NA
121H4	YLR247C	YLR247C	BY4742	NA
121H5	YLR248W	RCK2	BY4742	NA
121H6	YLR250W	SSP120	BY4742	NA
121H7	YLR251W	YLR251W	BY4742	NA
121H8	YLR252W	YLR252W	BY4742	NA
121H9	YLR253W	YLR253W	BY4742	NA
122A12	YLR270W	YLR270W	BY4742	MT error
122A2	YLR260W	LCB5	BY4742	NA
122A3	YLR261C	YLR261C	BY4742	NA
122C7	YLR295C	ATP14	BY4742	NA
122D1	YLR304C	ACO1	BY4742	NA
122D10	YLR315W	YLR315W	BY4742	NA
122D11	YLR318W	EST2	BY4742	NA
122D4	YLR308W	CDA2	BY4742	NA
122E1	YLR320W	YLR320W	BY4742	MT error
122E2	YLR322W	YLR322W	BY4742	MT error
122G2	YGL226W	YGL226W	BY4742	NA
122H2	YGL244W	RTF1	BY4742	NA
122H4	YGL246C	RAI1	BY4742	NA
122H9	YGL252C	RTG2	BY4742	NA
123A12	YGR006W	PRP18	BY4742	NA
123B1	YGR007W	MUQ1	BY4742	NA
123B10	YGR020C	VMA7	BY4742	MT error
123C8	YPL086C	ELP3	BY4742	NA
123C9	YPL084W	BRO1	BY4742	NA
123E5	YPL059W	GRX5	BY4742	NA
123F10	YPL040C	ISM1	BY4742	NA
123F7	YPL045W	VPS16	BY4742	NA
123G5	YPL031C	PHO85	BY4742	NA
123G6	YPL030W	YPL030W	BY4742	NA
123G7	YPL029W	SUV3	BY4742	NA
123H11	YPL006W	NCR1	BY4742	NA
123H8	YPL013C	YPL013C	BY4742	NA
124A4	YPR001W	CIT3	BY4742	NA
124B2	YPR116W	YPR116W	BY4742	NA
124B8	YPR123C	YPR123C	BY4742	NA
124B9	YPR124W	CTR1	BY4742	NA
124C10	YPR139C	YPR139C	BY4742	NA
124D8	YPR153W	YPR153W	BY4742	NA
124E11	YPR173C	VPS4	BY4742	NA
125C5	YGR220C	MRPL9	BY4742	NA
125C7	YGR222W	PET54	BY4742	NA
125D10	YGR237C	YGR237C	BY4742	MT error
125E2	YGR243W	YGR243W	BY4742	NA
125F3	YBL011W	SCT1	BY4742	NA
125G1	YBL025W	RRN10	BY4742	NA
125G5	YBL031W	SHE1	BY4742	NA
125G6	YBL032W	YBL032W	BY4742	NA
125G7	YBL036C	YBL036C	BY4742	NA
125G9	YBL038W	MRPL16	BY4742	NA
125H1	YBL044W	YBL044W	BY4742	NA
125H10	YBL053W	YBL053W	BY4742	NA
125H2	YBL045C	COR1	BY4742	NA
125H4	YBL046W	YBL046W	BY4742	NA
126A2	YBL057C	YBL057C	BY4742	NA
126A3	YBL058W	SHP1	BY4742	NA
126A7	YBL062W	YBL062W	BY4742	NA
126B10	YBL081W	YBL081W	BY4742	NA
126B11	YBL082C	RHK1	BY4742	NA
126B9	YBL080C	PET112	BY4742	NA
126C7	YBL090W	MRP21	BY4742	NA
126D5	YGL012W	ERG4	BY4742	NA
126G7	YGL067W	NPY1	BY4742	NA
126G8	YGL070C	RPB9	BY4742	NA
127A1	YGL090W	LIF1	BY4742	NA
127B1	YNL212W	VID27	BY4742	NA
127C10	YNL185C	MRPL19	BY4742	NA
127C11	YNL184C	YNL184C	BY4742	NA
127D1	YNL180C	RHO5	BY4742	NA
127D3	YNL177C	YNL177C	BY4742	MT error
127D7	YNL170W	YNL170W	BY4742	NA
127F2	YKL212W	SAC1	BY4742	NA
127F8	YKL221W	YKL221W	BY4742	NA
128A11	YKR058W	GLG1	BY4742	NA
128B6	YDR244W	PEX5	BY4742	NA
128D12	YDR277C	MTH1	BY4742	NA
128E1	YDR278C	YDR278C	BY4742	NA
128F1	YDR294C	DPL1	BY4742	NA
128F3	YDR296W	MHR1	BY4742	NA
128F5	YDR298C	ATP5	BY4742	NA
128G11	YDR322W	MRPL35	BY4742	NA
128G12	YDR323C	PEP7	BY4742	NA
128H9	YDR337W	MRPS28	BY4742	NA
129B8	YIL039W	YIL039W	BY4742	NA
129C2	YIL049W	DFG10	BY4742	NA
129D6	YIL090W	YIL090W	BY4742	NA
129E5	YFL023W	FYV11	BY4742	MT error
129G8	YFR001W	LOC1	BY4742	NA
130B7	YGR285C	ZUO1	BY4742	MT error
130C1	YHR039C-B	YHR039C-B	BY4742	NA
130C10	YIR021W	MRS1	BY4742	NA
130C3	YIL009C-A	EST3	BY4742	NA
130F11	YMR066W	SOV1	BY4742	NA
130F3	YKR078W	YKR078W	BY4742	NA
130F9	YMR064W	AEP1	BY4742	NA
130G3	YMR070W	MOT3	BY4742	NA
130G5	YMR072W	ABF2	BY4742	NA
130G9	YMR077C	VPS20	BY4742	NA
130H10	YMR089C	YTA12	BY4742	NA
130H12	YMR091C	NPL6	BY4742	NA
131B5	YOL095C	HMI1	BY4742	NA
131B6	YOL096C	COQ3	BY4742	NA
131B9	YOL100W	PKH2	BY4742	NA
131C6	YOL110W	SHR5	BY4742	NA
131E8	YER077C	YER077C	BY4742	NA
131G6	YHR168W	YHR168W	BY4742	NA
132A7	YMR171C	YMR171C	BY4742	NA
132B8	YMR317W	YMR317W	BY4742	NA
132C1	YNL252C	MRPL17	BY4742	NA
132C10	YPL132W	COX11	BY4742	NA
132E9	YML110C	COQ5	BY4742	NA
132F11	YML129C	COX14	BY4742	NA
132G1	YMR004W	MVP1	BY4742	NA
132G5	YMR098C	YMR098C	BY4742	NA
132H12	YMR122C	YMR122C	BY4742	MT error
133A4	YMR126C	YMR126C	BY4742	NA
133B1	YPR012W	YPR012W	BY4742	NA
133B11	YPR032W	SRO7	BY4742	NA
133C8	YPR047W	MSF1	BY4742	NA
133E11	YPR087W	YPR087W	BY4742	MT error
133F10	YPR101W	SNT309	BY4742	MT error
133F8	YPR099C	YPR099C	BY4742	NA
133F9	YPR100W	YPR100W	BY4742	NA
133H2	YJL100W	YJL100W	BY4742	NA
134A1	YJL080C	SCP160	BY4742	NA
134A10	YJL063C	MRPL8	BY4742	NA
134A11	YJL062W	LAS21	BY4742	NA
134D7	YJR105W	ADO1	BY4742	MT error
134D8	YJR108W	ABM1	BY4742	NA
134F11	YHR004C	NEM1	BY4742	NA
134F12	YHR005C	GPA1	BY4742	NA
134F4	YGR188C	BUB1	BY4742	MT error
134F6	YGR204W	ADE3	BY4742	MT error
134F8	YHL011C	PRS3	BY4742	MT error
134G1	YHR006W	STP2	BY4742	NA
134G3	YHR009C	YHR009C	BY4742	NA
134G4	YHR025W	THR1	BY4742	MT error
134G5	YHR026W	PPA1	BY4742	MT error
134G6	YHR041C	SRB2	BY4742	MT error
134G7	YHR059W	FYV4	BY4742	MT error
134H1	YHR194W	YHR194W	BY4742	MT error
134H2	YLL007C	YLL007C	BY4742	NA
135B5	YLL018C-A	COX19	BY4742	NA
135C6	YLR436C	ECM30	BY4742	NA
135D3	YLR447C	VMA6	BY4742	MT error
135D8	YLR453C	RIF2	BY4742	NA
135G5	YAL047C	SPC72	BY4742	MT error
135G6	YAL054C	ACS1	BY4742	NA
135G7	YAL058C-A	KRE20	BY4742	NA
136A10	YJR091C	JSN1	BY4742	NA
136A11	YJR094C	IME1	BY4742	NA
136A12	YJR094W-A	RPL43B	BY4742	NA
136A2	YJR069C	HAM1	BY4742	NA
136A3	YJR070C	YJR070C	BY4742	NA
136A4	YJR074W	MOG1	BY4742	NA
136A5	YJR077C	MIR1	BY4742	NA
136A6	YJR080C	YJR080C	BY4742	NA
136A7	YJR084W	YJR084W	BY4742	NA
136A8	YJR087W	YJR087W	BY4742	NA
136A9	YJR090C	GRR1	BY4742	NA
136B1	YJR095W	SFC1	BY4742	NA
136B10	YJR109C	CPA2	BY4742	NA
136B11	YJR113C	RSM7	BY4742	NA
136B12	YJR116W	YJR116W	BY4742	NA
136B2	YJR096W	YJR096W	BY4742	NA
136B3	YJR097W	YJR097W	BY4742	NA
136B4	YJR098C	YJR098C	BY4742	NA
136B5	YJR099W	YUH1	BY4742	NA
136B6	YJR100C	YJR100C	BY4742	NA
136B7	YJR104C	SOD1	BY4742	NA
136B8	YJR106W	ECM27	BY4742	NA
136B9	YJR107W	YJR107W	BY4742	NA
136C1	YJR117W	STE24	BY4742	NA
136C10	YJR131W	MNS1	BY4742	NA
136C11	YJR133W	XPT1	BY4742	NA
136C2	YJR118C	ILM1	BY4742	NA
136C3	YJR119C	YJR119C	BY4742	NA
136C4	YJR120W	YJR120W	BY4742	NA
136C5	YJR121W	ATP2	BY4742	NA
136C6	YJR122W	CAF17	BY4742	NA
136C7	YJR124C	YJR124C	BY4742	NA
136C8	YJR125C	ENT3	BY4742	NA
136C9	YJR126C	YJR126C	BY4742	NA
136D1	YJR134C	SGM1	BY4742	NA
136D10	YKL005C	YKL005C	BY4742	NA
136D11	YKL030W	YKL030W	BY4742	NA
136D12	YLR146C	SPE4	BY4742	NA
136D2	YJR139C	HOM6	BY4742	NA
136D3	YJR140C	HIR3	BY4742	NA
136D4	YJR142W	YJR142W	BY4742	NA
136D5	YJR144W	MGM101	BY4742	NA
136D6	YJR145C	RPS4A	BY4742	NA
136D7	YJR148W	BAT2	BY4742	NA
136D8	YJR150C	DAN1	BY4742	NA
136D9	YJR153W	PGU1	BY4742	NA
136E1	YLR286C	CTS1	BY4742	NA
136E10	YDL191W	RPL35A	BY4742	NA
136E11	YDL192W	ARF1	BY4742	NA
136E12	YDL197C	ASF2	BY4742	NA
136E2	YLR343W	YLR343W	BY4742	NA
136E3	YML067C	ERV41	BY4742	NA
136E4	YML068W	YML068W	BY4742	NA
136E5	YML072C	YML072C	BY4742	NA
136E6	YMR136W	GAT2	BY4742	NA
136E7	YMR172W	HOT1	BY4742	NA
136F1	YDL198C	YHM1	BY4742	NA
136F10	YDL211C	YDL211C	BY4742	NA
136F11	YDL213C	FYV14	BY4742	NA
136F12	YDL214C	PRR2	BY4742	NA
136F2	YDL199C	YDL199C	BY4742	NA
136F3	YDL200C	MGT1	BY4742	NA
136F4	YDL201W	YDL201W	BY4742	NA
136F5	YDL202W	MRPL11	BY4742	NA
136F6	YDL203C	YDL203C	BY4742	NA
136F7	YDL204W	YDL204W	BY4742	NA
136F8	YDL206W	YDL206W	BY4742	NA
136F9	YDL210W	UGA4	BY4742	NA
136G1	YDL215C	GDH2	BY4742	NA
136G10	YDL227C	HO	BY4742	NA
136G11	YDL229W	SSB1	BY4742	NA
136G12	YDL230W	PTP1	BY4742	NA
136G2	YDL216C	RRI1	BY4742	NA
136G3	YDL218W	YDL218W	BY4742	NA
136G4	YDL219W	YDL219W	BY4742	NA
136G5	YDL222C	YDL222C	BY4742	NA
136G6	YDL223C	YDL223C	BY4742	NA
136G7	YDL224C	WHI4	BY4742	NA
136G8	YDL225W	SHS1	BY4742	NA
136G9	YDL226C	GCS1	BY4742	NA
136H1	YDL231C	BRE4	BY4742	NA
136H10	YDL240W	LRG1	BY4742	NA
136H11	YDL241W	YDL241W	BY4742	NA
136H12	YDL242W	YDL242W	BY4742	NA
136H2	YDL232W	OST4	BY4742	NA
136H4	YDL233W	YDL233W	BY4742	NA
136H5	YDL234C	GYP7	BY4742	NA
136H6	YDL236W	PHO13	BY4742	NA
136H7	YDL237W	YDL237W	BY4742	NA
136H8	YDL238C	YDL238C	BY4742	NA
136H9	YDL239C	ADY3	BY4742	NA
137A9	YDR010C	YDR010C	BY4742	NA
137B1	YDR017C	KCS1	BY4742	NA
137B9	YDR027C	LUV1	BY4742	NA
137D7	YBR279W	PAF1	BY4742	NA
137D9	YBR282W	MRPL27	BY4742	NA
137F1	YCR024C	YCR024C	BY4742	NA
137F12	YCR044C	PER1	BY4742	NA
137G11	YCR071C	IMG2	BY4742	NA
137G7	YCR063W	BUD31	BY4742	MT error
137H11	YJL003W	YJL003W	BY4742	NA
137H2	YCR077C	PAT1	BY4742	MT error
137H5	YCR081W	SRB8	BY4742	NA
138B2	YJL029C	VPS53	BY4742	NA
138C1	YJR018W	YJR018W	BY4742	NA
138C10	YJR032W	CPR7	BY4742	MT error
138E10	YJR063W	RPA12	BY4742	MT error
138E11	YDL096C	YDL096C	BY4742	NA
138E12	YDL099W	YDL099W	BY4742	NA
138F10	YDL114W	YDL114W	BY4742	NA
138F12	YDL116W	NUP84	BY4742	MT error
138F4	YDL106C	PHO2	BY4742	MT error
138F5	YDL107W	MSS2	BY4742	NA
138G11	YDL129W	YDL129W	BY4742	NA
138G12	YDL130W	RPP1B	BY4742	MT error
138G2	YDL118W	YDL118W	BY4742	NA
138G3	YDL119C	YDL119C	BY4742	NA
138H2	YDL133W	YDL133W	BY4742	NA
138H7	YDL136W	RPL35B	BY4742	MT error
139A6	YDL157C	YDL157C	BY4742	NA
139A7	YDL158C	YDL158C	BY4742	NA
139A8	YDL159W	STE7	BY4742	NA
139C6	YDL185W	TFP1	BY4742	NA
139D11	YGL088W	YGL088W	BY4742	MT error
139D7	YGL017W	ATE1	BY4742	NA
139D8	YGL020C	YGL020C	BY4742	NA
139E1	YGL095C	VPS45	BY4742	NA
139F11	YIL055C	YIL055C	BY4742	NA
139F5	YIL018W	RPL2B	BY4742	NA
139F9	YIL052C	RPL34B	BY4742	NA
139G4	YIL069C	RPS24B	BY4742	NA
139H1	YBL099W	ATP1	BY4742	NA
139H11	YBR003W	COQ1	BY4742	NA
139H2	YBL100C	YBL100C	BY4742	NA
140C4	YBR036C	CSG2	BY4742	NA
140C6	YBR040W	FIG1	BY4742	NA
140D7	YBR053C	YBR053C	BY4742	NA
140E12	YBR074W	YBR074W	BY4742	NA
140F8	YNL005C	MRP7	BY4742	NA
141A11	YNR006W	VPS27	BY4742	NA
141C12	YNR036C	YNR036C	BY4742	NA
141C5	YNR028W	CPR8	BY4742	NA
141D1	YNR037C	RSM19	BY4742	NA
141D4	YNR041C	COQ2	BY4742	NA
141D6	YNR042W	YNR042W	BY4742	NA
141D8	YNR045W	PET494	BY4742	NA
141F10	YNL081C	YNL081C	BY4742	NA
141F12	YNL064C	YDJ1	BY4742	MT error
141F9	YNL084C	END3	BY4742	NA
142A3	YIL130W	YIL130W	BY4742	MT error
142A5	YIL133C	RPL16A	BY4742	MT error
142A8	YIL137C	YIL137C	BY4742	NA
142B10	YIL159W	BNR1	BY4742	MT error
142B11	YIL160C	POT1	BY4742	MT error
142E3	YOR125C	CAT5	BY4742	NA
142E7	YOR150W	MRPL23	BY4742	NA
142E8	YOR187W	TUF1	BY4742	NA
142F12	YNL073W	MSK1	BY4742	NA
143A10	YDR202C	RAV2	BY4742	MT error
143A11	YDR205W	MSC2	BY4742	MT error
143A12	YDR445C	YDR445C	BY4742	MT error
143A4	YBR189W	RPS9B	BY4742	NA
143A8	YDR058C	TGL2	BY4742	MT error
143A9	YDR174W	HMO1	BY4742	MT error
143B10	YGR063C	SPT4	BY4742	MT error
143B11	YGR086C	YGR086C	BY4742	MT error
143E10	YKL139W	CTK1	BY4742	NA
143E11	YKL194C	MST1	BY4742	NA
143E2	YJL189W	RPL39	BY4742	NA
143G10	YBR090C	YBR090C	BY4742	NA
143G12	YBR112C	CYC8	BY4742	NA
143G7	YAR002C-A	ERP1	BY4742	NA
144A10	YCR046C	IMG1	BY4742	NA
144A11	YCR047C	BUD23	BY4742	MT error
144A6	YCR028C-A	RIM1	BY4742	NA
144B1	YCR053W	THR4	BY4742	MT error
144B11	YCR089W	FIG2	BY4742	NA
144B9	YCR084C	TUP1	BY4742	NA
144C12	YLR358C	YLR358C	BY4742	MT error
144C3	YDR074W	TPS2	BY4742	NA
144D1	YLR361C	YLR361C	BY4742	MT error
144D3	YLR382C	NAM2	BY4742	NA
144F3	YPL148C	PPT2	BY4742	NA
144F4	YPL183C	YPL183C	BY4742	NA
144F5	YPL183W-A	YPL183W-A	BY4742	NA
144G1	YIR023W	DAL81	BY4742	NA
144H2	YNL315C	ATP11	BY4742	NA
145C1	YHR146W	CRP1	BY4742	NA
145C10	YKR085C	MRPL20	BY4742	NA
145C9	YJL128C	PBS2	BY4742	NA
145D5	YLR439W	MRPL4	BY4742	NA
145D6	YLR442C	SIR3	BY4742	MT error
145E2	YNR052C	POP2	BY4742	MT error
145E5	YOL125W	YOL125W	BY4742	NA
145F4	YPR043W	RPL43A	BY4742	MT error
145H9	YBR117C	TKL2	BY4742	NA
146A2	YBR128C	APG14	BY4742	NA
146B2	YBR146W	MRPS9	BY4742	NA
146C11	YDL005C	MED2	BY4742	MT error
146D12	YDL023C	YDL023C	BY4742	MT error
146D4	YDL012C	YDL012C	BY4742	NA
146D9	YDL021W	GPM2	BY4742	NA
146E12	YDL039C	PRM7	BY4742	NA
146F2	YDL041W	KRE26	BY4742	NA
146F3	YDL042C	SIR2	BY4742	NA
146F4	YDL044C	MTF2	BY4742	NA
146F5	YDL045W-A	MRP10	BY4742	NA
146G10	YDL068W	YDL068W	BY4742	NA
146G2	YDL056W	MBP1	BY4742	NA
146G9	YDL067C	COX9	BY4742	NA
146H7	YDL077C	VAM6	BY4742	NA
146H8	YDL078C	MDH3	BY4742	NA
147A2	YDL085W	YDL085W	BY4742	NA
147A7	YDL091C	YDL091C	BY4742	NA
147A8	YDL093W	PMT5	BY4742	NA
147B3	YDR442W	YDR442W	BY4742	MT error
147B7	YDR448W	ADA2	BY4742	NA
147C11	YDR470C	UGO1	BY4742	MT error
147C3	YDR458C	YDR458C	BY4742	NA
147C4	YDR459C	YDR459C	BY4742	NA
147C5	YDR462W	MRPL28	BY4742	NA
147E2	YDR491C	YDR491C	BY4742	NA
147E4	YDR494W	YDR494W	BY4742	NA
147F10	YDR518W	EUG1	BY4742	NA
147F4	YDR511W	ACN9	BY4742	NA
147G3	YDR523C	SPS1	BY4742	NA
147G4	YDR524C	AGE1	BY4742	NA
147G7	YDR529C	QCR7	BY4742	NA
147H2	YGL107C	YGL107C	BY4742	NA
148A3	YGL129C	RSM23	BY4742	NA
148B1	YGL143C	MRF1	BY4742	NA
148C10	YGL167C	PMR1	BY4742	NA
148C8	YGL165C	YGL165C	BY4742	NA
148D1	YGL173C	KEM1	BY4742	MT error
148D2	YGL174W	BUD13	BY4742	MT error
148E12	YER119C-A	YER119C-A	BY4742	NA
148E6	YER114C	BOI2	BY4742	NA
148F9	YER131W	RPS26B	BY4742	NA
148G4	YER141W	COX15	BY4742	NA
148G7	YER145C	FTR1	BY4742	NA
148H1	YER154W	OXA1	BY4742	NA
148H2	YER155C	BEM2	BY4742	NA
149A7	YER178W	PDA1	BY4742	MT error
149B11	YMR057C	YMR057C	BY4742	MT error
149D4	YDL061W	YDL061W	BY4742	MT error
149D6	YDR477W	SNF1	BY4742	MT error
149D7	YDR500C	RPL37B	BY4742	MT error
149E5	YLR373C	VID22	BY4742	MT error
149H12	YFL001W	DEG1	BY4742	MT error
150A11	YGR252W	GCN5	BY4742	MT error
150B1	YGR255C	COQ6	BY4742	NA
150B2	YGR257C	YGR257C	BY4742	NA
150B5	YGR272C	YGR272C	BY4742	MT error
150C10	YNL059C	ARP5	BY4742	NA
150D10	YOL148C	SPT20	BY4742	MT error
150D5	YNL147W	LSM7	BY4742	MT error
150D8	YNL315C	ATP11	BY4742	NA
170A2	YER050C	RSM18	BY4742	MT error
170B1	YMR228W	MTF1	BY4742	MT error
170C10	YOL009C	MDM12	BY4742	MT error
170C11	YOL033W	MSE1	BY4742	MT error
170C2	YJL180C	ATP12	BY4742	MT error
170C4	YLL027W	ISA1	BY4742	MT error
170C5	YLL033W	YLL033W	BY4742	MT error
170D12	YOR211C	MGM1	BY4742	MT error
170E4	YLR091W	YLR091W	BY4742	MT error
170F4	YDR114C	YDR114C	BY4742	MT error
170F5	YDR115W	YDR115W	BY4742	MT error
170F6	YLR139C	SLS1	BY4742	MT error
170G10	YGR180C	RNR4	BY4742	MT error
170G4	YGR076C	MRPL25	BY4742	MT error
170G5	YGR102C	YGR102C	BY4742	MT error
170G7	YGR167W	CLC1	BY4742	NA
170H10	YLR148W	PEP3	BY4742	NA
170H2	YKL114C	APN1	BY4742	NA
170H8	YMR231W	PEP5	BY4742	NA
171A2	YLR240W	VPS34	BY4742	MT error
171A4	YNL220W	ADE12	BY4742	NA
171A5	YNL243W	SLA2	BY4742	NA
171B1	YNL225C	CNM67	BY4742	NA
171B11	YOL143C	RIB4	BY4742	NA
171B5	YML095C-A	YML095C-A	BY4742	MT error
171B6	YJL127C	SPT10	BY4742	MT error
171B8	YJL102W	MEF2	BY4742	NA
171B9	YJL096W	MRPL49	BY4742	NA
171C1	YAL016W	TPD3	BY4742	MT error
171C11	YGL038C	OCH1	BY4742	NA
171C3	YBR039W	ATP3	BY4742	NA
171C4	YNL139C	RLR1	BY4742	MT error
171C6	YJL184W	YJL184W	BY4742	NA
171C8	YPL268W	PLC1	BY4742	NA
171D1	YGL206C	CHC1	BY4742	NA
171D2	YGL240W	DOC1	BY4742	NA
171D3	YGL223C	YGL223C	BY4742	MT error
171D9	YJL075C	YJL075C	BY4742	MT error
171E10	YEL036C	ANP1	BY4742	MT error
171E11	YEL044W	YEL044W	BY4742	NA
171E12	YER068W	MOT2	BY4742	MT error
171E3	YLR239C	LIP2	BY4742	MT error
171E4	YLR242C	ARV1	BY4742	MT error
171F4	YFL016C	MDJ1	BY4742	MT error
171F6	YBL033C	RIB1	BY4742	NA
